# Supplementary material for: PALMD regulates aortic valve calcification via altered glycolysis and NF-κB–mediated inflammation
Source: PubMed Central journal article supplement — J Biol Chem. 2022 Apr 1;298(5):101887. doi: 10.1016/j.jbc.2022.101887 (PMC9065630; doi:10.1016/j.jbc.2022.101887), 2022-04-01

## Supporting information

### **PALMD regulates aortic valve calcification via altered glycolysis and NF- $\kappa$ B-mediated inflammation**

Siying Wang<sup>#1,2</sup>, Hongjiao Yu<sup>#3</sup>, Jun Gao<sup>#1</sup>, Jiixin Chen<sup>2</sup>, Pengcheng He<sup>4</sup>, Hui Zhong<sup>2</sup>, Xiao Tan<sup>2</sup>, Katherine A Staines<sup>5</sup>, Vicky E. Macrae<sup>6</sup>, Xiaodong Fu<sup>\*2</sup>, Lei Jiang<sup>\*4</sup>, Dongxing Zhu<sup>\*2</sup>

1. Department of Basic Medical Research, The Sixth Affiliated Hospital of Guangzhou Medical University, Qingyuan, Guangdong, 511518, China.
2. Guangzhou Institute of Cardiovascular Disease, Guangdong Key Laboratory of Vascular Diseases, State Key Laboratory of Respiratory Disease, the Second Affiliated Hospital, School of Basic Medical Sciences, Guangzhou Medical University, Guangzhou, Guangdong, 510260, China.
3. Department of Biochemistry and Molecular Biology, GMU-GIBH Joint School of Life Science, Guangzhou Medical University, Guangzhou, 511436, China.
4. Guangdong Provincial Geriatrics Institute, and Department of Cardiology, Guangdong Cardiovascular Institute, Guangdong Provincial People's Hospital, Guangdong Academy of Medical Sciences, Guangzhou, China.
5. Centre for Stress and Age-Related Disease, School of Pharmacy and Biomolecular Sciences, University of Brighton, UK.
6. Functional Genetics and Development, The Royal (Dick) School of Veterinary Studies and The Roslin Institute, University of Edinburgh, Midlothian, UK.

#### **This word file includes:**

- Detailed Materials and Methods
- Figures S1-S19
- Tables S1-S5
- Unedited gels

## Materials and Methods

### Tissue dissection

The aortic valves obtained from CAVD patients undergoing aortic valve replacement surgery were stored in HBSS buffer (Hyclone, SC30588.01) and immediately transported to the laboratory. Non-calcified and calcified tissues were carefully dissected from the collected aortic valves as previously described (52). In brief, macroscopically non-calcified tissues were defined as transparent and pliable tissue, while calcified tissues were defined as solid, non-pliable, thickened, non-transparent tissue. After dissection, a portion of non-calcified and calcified tissues were sectioned for alizarin red staining to confirm the degree of calcification. The remaining non-calcified and calcified tissues were immediately frozen in liquid nitrogen and stored at -80 °C for RNA extraction.

### Isolation and culture of human valve interstitial cells (hVICs)

hVICs were isolated and characterized as previously described (23, 24, 51). In brief, non-calcified regions of aortic valve tissues from CAVD patients were carefully dissected. After incubation with 1 mg/ml trypsin (Gibco, 12605-010) for 10 min, the tissues were gently scraped to remove the valve endothelial layer, and then cut into small pieces. Subsequently, samples were washed in HBSS buffer (Hyclone, SC30588.01), and digested in 250 U/ml type II collagenase solution (Worthington, 47D17411A) at 37°C for 7 hrs. Obtained cells were re-suspended in growth media consisting of  $\alpha$ -MEM supplemented with 10% FBS (Gibco, 16000-044), 100 U/mL of penicillin (HyClone, SH40003.01), and 100 mg/ml of streptomycin (Hyclone, SV30010), and seeded onto a 25 cm<sup>2</sup> flask coated with 0.25  $\mu$ g/cm<sup>2</sup> type I collagen (Gibco, A1048301) at 37°C with 5% CO<sub>2</sub>. The media was changed every 2 to 3 days. Cells were passaged 2 to 4 times before each experiment. The purity of isolated hVICs was characterized by immunofluorescence staining of vimentin and smooth muscle protein 22 alpha (SM22 $\alpha$ ) as previously described (53). The NF- $\kappa$ B inhibitor SC75741 (Sigma, SML2382) was prepared in dimethyl sulfoxide (DMSO) according to the manufacturer's instructions, and used at the final concentration of 1  $\mu$ M according to previous publication. The solvent DMSO served as a negative control (54).

### Induction and detection of hVIC *in vitro* calcification

hVIC *in vitro* calcification was induced as previously reported (23, 24, 51). hVICs were seeded at the density of 1.0x10<sup>5</sup> cells/well in 6-well plates and incubated with growth media. To induce hVIC *in vitro* calcification, the cells were treated with control (1.0 mM Pi/1.8mM Ca) or calcifying media (50  $\mu$ g/mL ascorbic acid/2.5 mM Pi/2.7 mM Ca) for up to 7 days. Pi was prepared as a combination of NaH<sub>2</sub>PO<sub>4</sub>/Na<sub>2</sub>HPO<sub>4</sub>, pH=7.4.

Calcium deposition was detected by alizarin red staining. Briefly, cells were washed twice with cold PBS, fixed with 4% paraformaldehyde (PFA) for 10 min, stained with 2% alizarin red (pH 4.2) for 10 min at room temperature, and photographed. Quantitative analysis of calcium deposition in hVICs was also performed. The cells were washed twice with cold PBS, decalcified with 0.6 M HCl at 4°C overnight. The supernatants were then collected and used to quantify calcium using a calcium colorimetric assay (Sigma, MAK022-1KT). The cells were collected in lysis buffer (0.1 M NaOH and 0.1% SDS) for protein quantification using bicinchoninic acid

(BCA) protein assay kit (Thermo Fisher, 23235). Calcium content was normalized to total protein and expressed as  $\mu\text{g}/\text{mg}$  protein.

### **Real-time quantitative polymerase chain reaction (RT-qPCR)**

Total RNA was extracted from hVICs using TaKaRa MiniBEST Universal RNA Extraction Kit (Takara, 9767) or from non-calcified regions and calcified regions of aortic valve leaflets from CAVD patients using Trizol (Invitrogen, 1596026). The genomic DNA contaminations from RNA samples were removed using DNase I. For gene expression analysis, RNA was quantified and reverse transcribed using PrimeScript™ RT Master Mix (Takara, RR036A). RT-qPCR was performed with SYBR Premix Ex Taq II (Takara, RR820A) in the QuantStudio 5 real-time system (Life technologies). Relative mRNA expression levels were calculated using the  $2^{-\Delta\Delta\text{CT}}$  method and normalized;  $\beta$ -actin was used as a housekeeping gene. The control values were expressed as 1 to indicate a precise fold change value for each gene of interest. The primer sequences for the gene of interest examined are listed in **Table S3**.

### **Western blotting**

hVICs were lysed in RIPA buffer (Beyotime Biotechnology, P0013B) containing 1 mM protease inhibitor phenylmethylsulfonyl fluoride (PMSF) (Beyotime Biotechnology, ST505). 10  $\mu\text{g}$  protein samples were analyzed on SDS-Polyacrylamide gel, and transferred to PVDF membranes. The membranes were blocked with 5% BSA in Tris Buffered Saline-Tween-20 (TBST), and incubated with primary antibodies overnight at 4 °C. The primary antibodies used in the present study are summarized in **Table S4**. Subsequently, membranes were incubated with HRP-conjugated anti-mouse (1:10000, Cell Signaling Technology, 7076S) or anti-rabbit (1:10000, Cell Signaling Technology, 7074S) secondary antibodies for 1 hr at room temperature. The immune complexes were visualized by chemiluminescence Lumi-Light Western Blotting Substrate (Millipore, WBKLS0500), and imaged with Amersham Imager 600 from GE Healthcare.

### **siRNA-mediated gene silencing**

hVICs were seeded at the density of  $1.0 \times 10^5$  cells/well in 6-well plates and transfected with siRNAs using Lipofectamine RNAiMAX (Invitrogen, 13778) according to the manufacturer's instructions. A siRNA targeting PALMD (siPALMD) or PFKFB3 (siPFKFB3) was used at a concentration of 20 nM. Scrambled siRNA (siScrambled) at a concentration of 20 nM served as a negative control. All siRNAs were obtained from Guangzhou RiboBio Co., Ltd, China. siRNA-mediated knockdown efficiency was confirmed by RT-qPCR and Western blotting. For hVIC *in vitro* calcification experiments, cells were re-transfected every 4 days during the experiments in order to ensure the optimal knockdown efficiency. The siRNA sequences for PALMD and PFKFB3 are outlined in **Table S5**.

### **Adenovirus-mediated overexpression of PALMD**

Recombinant adenoviruses expressing flag-tagged PALMD (Ad-PALMD) and adenoviruses containing empty plasmids (Ad-null) that served as negative controls were constructed and purchased from Hanheng Bioscience Incorporation, Shanghai, China. The schematic of plasmid construction are shown in **Figure S19**. In brief, full length human PALMD was amplified using PCR and subcloned into the pAdEasy-EF1-MCS-3flag-CMV-GFP. The PCR primer sequence was

sense: 5'-CAAGCTGTGACCGGCGCCTACTCTGGTACCGAGCTCGGATCCGCCACC-3' and antisense: 5'-GTCATCGTCATCCTTGTAGTCCTCGAGGATCACCTTTTTTCCCAGC-3'. hVICs were seeded at the density of  $1.0 \times 10^5$  cells/well in 6-well plates and infected with Ad-null or Ad-PALMD for 48 hrs at multiplicities of infection (MOI) of 100. The overexpression efficiency of PALMD was confirmed by RT-qPCR and Western blotting. For hVIC *in vitro* calcification assay, cells were re-infected every 4 days during the experiments.

### **Monocyte adhesion assay**

hVICs were seeded in 96 well plates, and transfected with siScrambled or siPALMD at the final concentration of 20 nM in the presence of control or 10ng/ml TNF $\alpha$  for 48 hrs. THP-1 cells were labeled with 0.2 mg/L calcein-AM (Sigma, 17783) for 30 min at 37 °C according to the manufacture's instructions, and incubated with hVICs for 1 hr. The co-cultured cells were washed with pre-warmed  $1 \times$  PBS and images were obtained under a fluorescence microscope. The data was expressed as number of THP1 cells adhered per field view.

### **Immunofluorescence staining**

hVICs were seeded on glass coverslips and incubated with control medium (Ctr) or calcifying medium (Cal.) for up to 7 days. Cells were then fixed, permeabilized with 0.3% triton x-100 (Beyotime Biotechnology, P0013B), and incubated overnight at 4°C with anti-PALMD (1:500, I Proteintech, 16531-1-AP). After washing three times with PBS, cells were incubated with Alexa Fluor®594 anti-rabbit antibodies (1:1000, Invitrogen, A11012) at 37 °C for 1 hr in dark. Glass coverslips were then stained with DAPI and the fluorescence signal was detected under Leica DMRB fluorescence microscope (Leica SP8). Negative controls were carried out simultaneously by incubating with equivalent concentrations of normal rabbit IgG (Cell signaling technology, 2729s) instead of primary antibody.

### **Immunohistochemistry**

Human aortic valve leaflets were fixed with 4% PFA for 24 hrs, dehydrated and embedded in paraffin wax before sectioning at 7  $\mu$ m using standard procedures. Sections were deparaffinized and rehydrated. Alizarin red staining was used to detect calcium deposition in calcified aortic valves from CAVD patients. The stained sections were scanned with a digital pathology slide scanner (Leica Aperio CS2) to obtain light microscopy images. To examine the expression of PALMD, the rehydrated sections were subjected to Tris-EDTA Buffer (pH 9.0) for antigen retrieval for 10 min at 95 °C. Endogenous peroxidase activity and non-specific antibody binding were blocked before overnight incubation at 4 °C with anti-PALMD antibody (1:100, Proteintech, 16531-1-AP). The sections were then washed three times in PBS, and incubated with secondary antibody using ChemMate™ EnVision™ Detection Kit (Gene Tech, GK500710) following the manufacturer's instructions. The sections were finally counterstained with hematoxylin and eosin, dehydrated, and mounted in neutral balsam (Solarbio, G8590). Negative controls were incubated with equal concentrations of normal rabbit IgG (Cell signaling technology, 2729s) instead of the primary antibody. Images were obtained with a digital pathology slide scanner (Leica Aperio CS2).

### **Detection of glucose uptake**

hVICs were seeded at 8,000 cells per well in 96-well plates. Cells were then transfected with 25 nM scrambled siRNA or siPLAMD for 48 hrs. hVICs were then cultured with 300  $\mu$ M fluorescent glucose analogue 2-(N-(7-Nitrobenz-2-oxa-1,3-diazol-4-yl)Amino)-2-Deoxyglucose (2-NBDG) (Life Technologies) for 20 min. Cells were washed twice with PBS. Fluorescence was quantified at 485 nm excitation and 535 nm emission on TECAN Spark® 10M multimode microplate reader and normalized against the total protein.

### **Seahorse Analysis**

Glycolytic function or oxidative phosphorylation was examined as previously reported (23). hVICs were seeded into Seahorse XFe96 FluxPak cell culture microplates (102601-100, Agilent Technologies) at a density of  $1.0 \times 10^4$  cells/well. Cells were then infected with Ad-null and Ad-PALMD at an MOI of 100 for 48 hrs. On the day of analysis, cells were washed 3 times with Seahorse XF assay medium (103575-100, Agilent Technologies) supplemented with 1 mM pyruvate, 2 mM glutamine, and 10 mM glucose at 37°C, and then incubated in a CO<sub>2</sub>-free incubator at 37°C for 60 min. The microplates were then placed in a Seahorse XFe96 bioanalyzer (Agilent Technologies LDA UK Limited). Oxygen consumption rate (OCR) changes were measured in response to oligomycin (1  $\mu$ M), FCCP (2  $\mu$ M) and rotenone/antimycin A (0.5  $\mu$ M) injection. The difference in OCR between FCCP and rotenone/antimycin A was considered maximal respiratory capacity. ATP-linked respiratory OCR was calculated from the difference between basal and oligomycin inhibited OCR. For the glycolytic rate assay, the microplates were placed in a Seahorse XFe96 bioanalyzer. After basal measurements were taken, rotenone/antimycin A was injected to a final concentration of 0.5  $\mu$ M. The maximum in glycolytic proton efflux rate (glycoPER) measurements following the addition of rotenone/antimycin A was considered as the compensatory glycolysis. Seahorse results were normalized to cell total protein content. Normalized Seahorse data were analyzed using Wave (software for XFp Analyzer, Agilent), and statistical calculations and graphical representations were created using Prism (Graphpad) software.

### **RNA sequencing**

hVICs were seeded at a density of  $1.0 \times 10^5$  cells/well in 6-well plates, and transfected with 20 nM siScrambled or siPALMD for 48 hrs. The cell samples were then sent to KangChen Biotech (Shanghai, People's Republic of China) for RNA sequencing. In brief, total RNA was extracted using Trizol (Invitrogen) according to the manufacturer's protocol. The concentration of total RNA was detected using a NanoDrop ND-1000 spectrophotometer (Thermo Scientific), and the integrity was examined by denaturing agarose gel electrophoresis. A total quantity of 1~2  $\mu$ g total RNA was purified using oligo (dT) conjugated magnetic beads. RNA-seq libraries were constructed using KAPA Stranded RNA-Seq Library Prep Kit (Illumina), and monitored using an Agilent Bioanalyzer 2100. RNA sequencing was performed on an Illumina HiSeq 4000 by KangChen Biotech. The RNA-seq data reported in this paper is deposited in NCBI Gene Omnibus (<http://www.ncbi.nlm.nih.gov/geo/>) with the accession number of GEO: GSE165524 on Jan 26, 2021. Raw data are public available after Jan 24, 2024.

## Supporting Figures

**Figure S1**

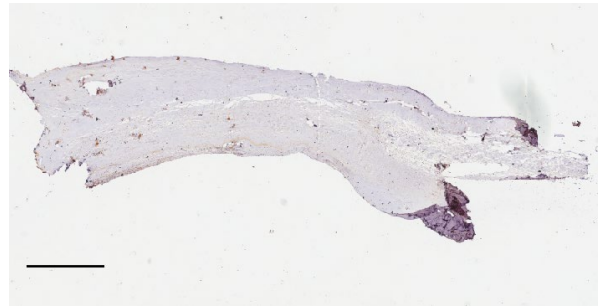

**Figure S1. Negative control staining for PALMD immunohistochemistry in calcified human aortic valves.** Equal amount of IgG used instead of Anti-PALMD served as negative controls for PALMD immunohistochemistry staining, and no positive staining was seen. Scale bar=800  $\mu$ m.

**Figure S2**

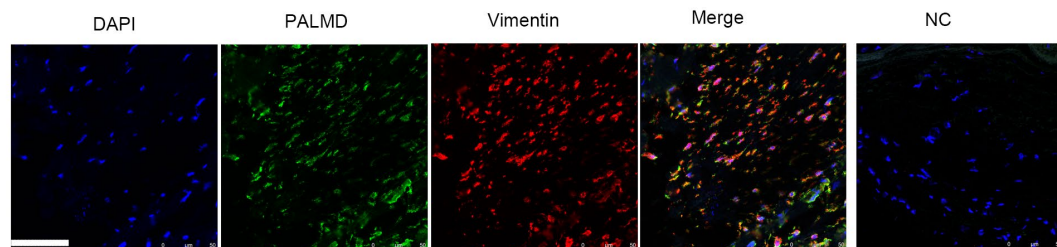

**Figure S2. PALMD is co-localized with the VIC marker Vimentin in calcified human aortic valve tissues.** Representative confocal images of double immunofluorescence staining for PALMD (Green) and Vimentin (Red) in calcified human aortic valve tissues. Scale bar=50  $\mu$ m.

**Figure S3**

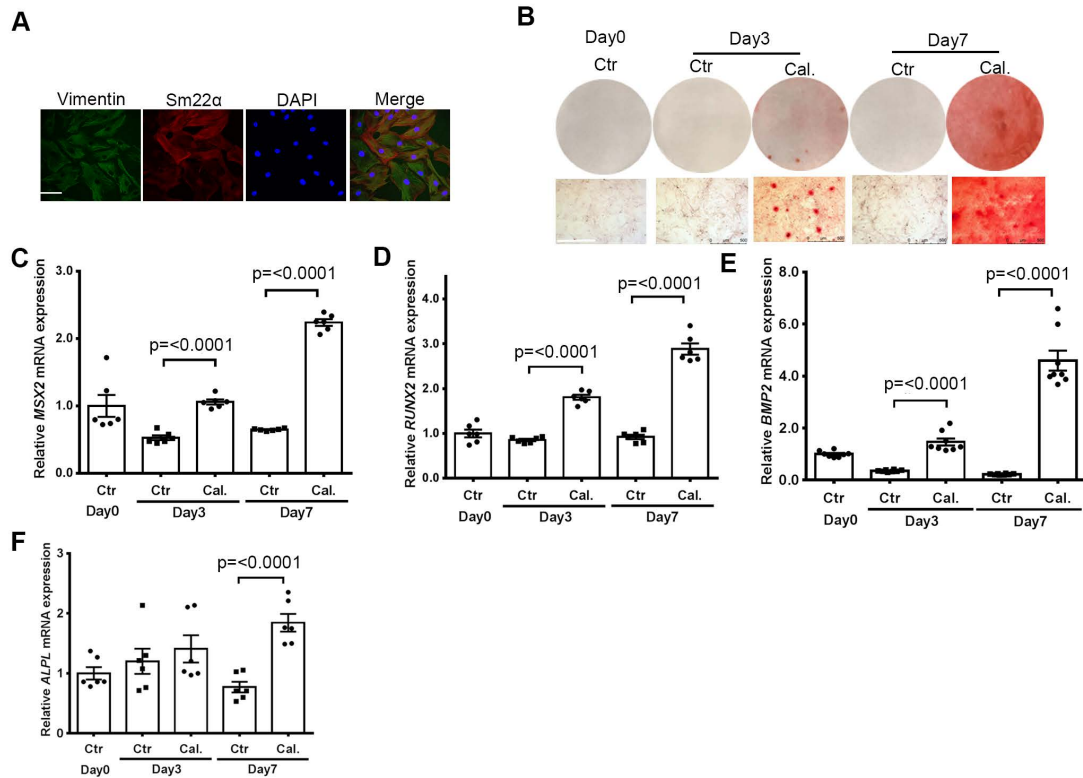

**Figure S3. hVICs undergo osteogenic differentiation during the calcification process.** hVICs were exposed to control (Ctr) or calcification media (Cal.) for up to 7 days. (A) Representative confocal images of double immunofluorescence staining for vimentin and alpha 22-smooth muscle actin (Sm22- $\alpha$ ) in hVICs, scale bar=50 $\mu$ m. (B) Representative images of alizarin red staining for hVICs treated with control (Ctr) or calcification media (Cal.) for up to 7 days, scale bar=500 $\mu$ m. (C-F) RT-qPCR showing the osteogenic gene *MSX2*, *RUNX2*, *BMP2* and *ALPL* mRNA expression during hVIC *in vitro* calcification, n=6-8. Data are presented as mean  $\pm$  SEM, and statistical significance was analyzed by a two-tailed unpaired Student's t-test.

**Figure S4**

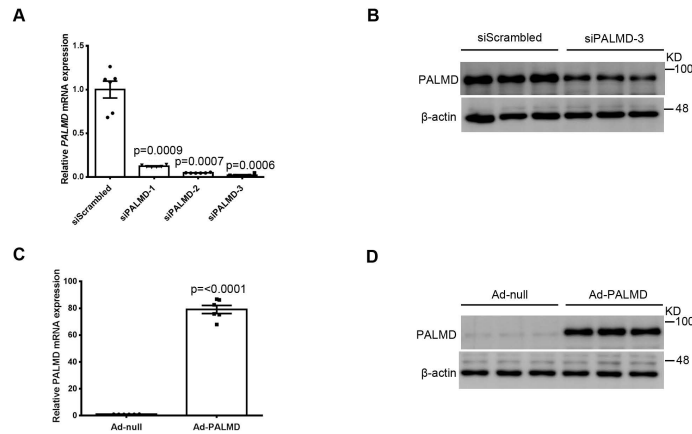

**Figure S4. Confirmation of PALMD knockdown and overexpression efficiency in hVICs.**

hVICs were transfected with 20 nM scrambled siRNA (siScrambled) and PALMD siRNA (siPALMD) or infected with empty adenoviruses (Ad-null) and PALMD adenoviruses (Ad-PALMD) at an MOI of 100 for 48 hrs. (A) RT-qPCR showing *PALMD* mRNA expression in hVICs with PALMD depletion, n=6. (B) Representative images of Western blotting for PALMD and  $\beta$ -actin protein expression in hVICs with PALMD depletion. (C) RT-qPCR showing *PALMD* mRNA expression in hVICs with PALMD overexpression, n=6. (D) Representative images of Western blotting for PALMD and  $\beta$ -actin protein expression in hVICs with PALMD overexpression. Data are presented as mean  $\pm$  SEM, and statistical significance was analyzed by a two-tailed unpaired Student's t-test or one-way ANOVA followed by Tukey's multiple comparisons test.

**Figure S5**

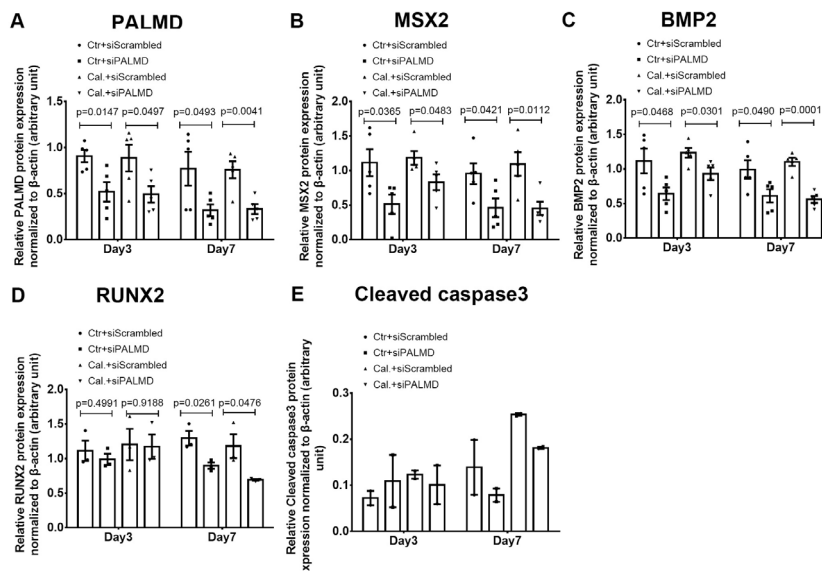

**Figure S5. Semi-quantitative analysis of the western blotting data presented in Figure 2G. (A) PALMD, n=5. (B) MSX2, n=5. (C) BMP2, n=5. (D) RUNX2, n=3. (E) Cleaved caspase 3, n=2. Data are presented as mean  $\pm$  SEM, and statistical significance was analyzed by a two-tailed unpaired Student's t-test.**



**Figure S6**

**A**

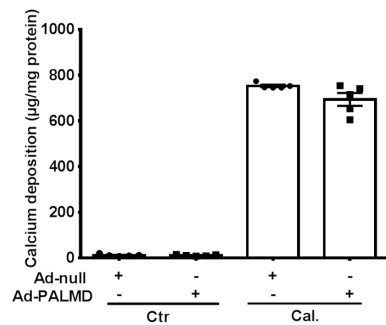

**Figure S6. PALMD overexpression did not alter calcium deposition in hVICs at day 7.** hVICs were infected with empty adenoviruses (Ad-null) or PALMD adenoviruses (Ad-PALMD) at an MOI of 100, and treated with control (Ctr) or calcification media (Cal.) for up to 7 days. Calcium quantitative assay showing calcium deposition in hVICs with PALMD overexpression at day 7, n=5. Data are presented as mean  $\pm$  SEM, and statistical significance was analyzed by a two-tailed unpaired Student's t-test.

**Figure S7**

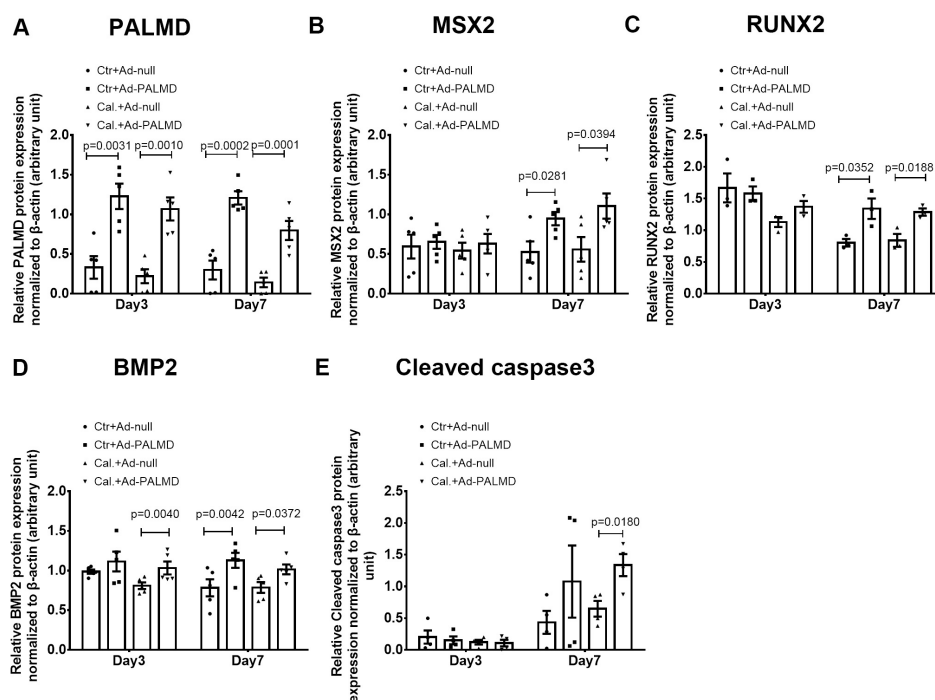

**Figure S7. Semi-quantitative analysis of the western blotting data presented in Figure 2L.** (A) PALMD, n=5. (B) MSX2, n=5. (C) RUNX2, n=3. (D) BMP2, n=5. (E) Cleaved caspase 3, n=4. Data are presented as mean  $\pm$  SEM, and statistical significance was analyzed by a two-tailed unpaired Student's t-test.

**Figure S8**

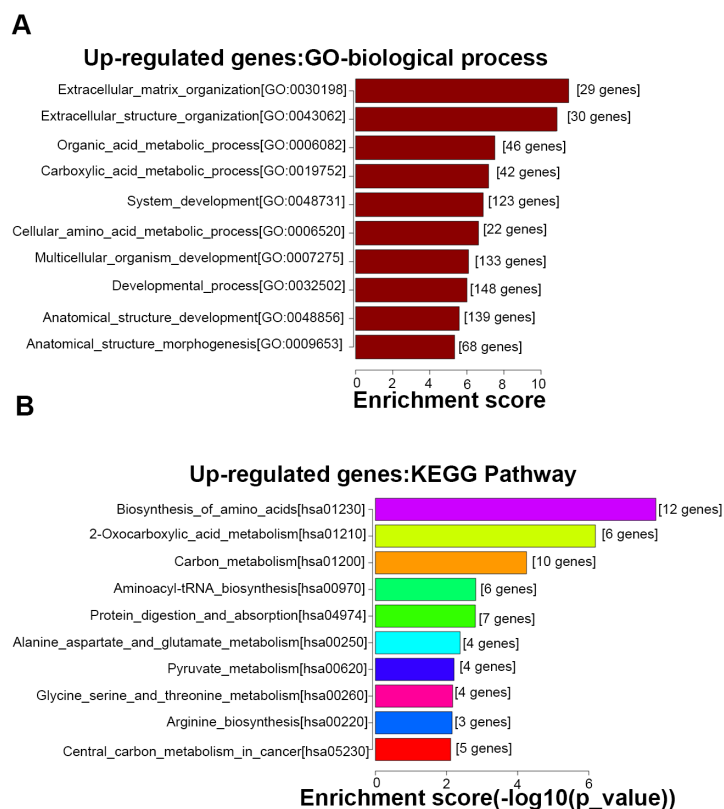

**Figure S8. Gene ontology and KEGG pathway analysis of the up-regulated genes in PALMD depleted hVICs identified by RNA-Seq.** hVICs were transfected with scrambled siRNA (siScrambled, 20 nM) or PALMD siRNA (siPALMD, 20 nM) for 48 hrs. (A) Up-regulated genes in hVICs with PALMD depletion are associated with biological processes, such as extracellular matrix and structural organization. (B) Up-regulated genes in hVICs with PALMD depletion are associated with multiple pathways, including biosynthesis of amino acids, and carbon metabolism.

**Figure S9**

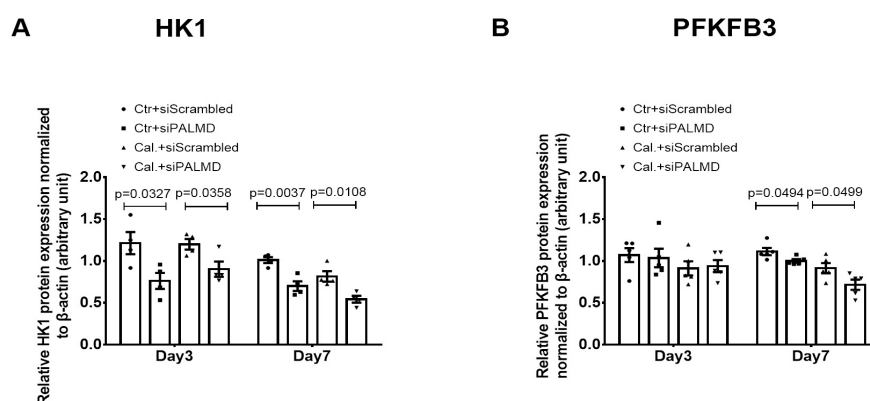

**Figure S9. Semi-quantitative analysis of the western blotting data presented in Figure 4B.** (A) HK1, n=4. (B) PFKFB3, n=5. Data are presented as mean  $\pm$  SEM, and statistical significance was analyzed by a two-tailed unpaired Student's t-test.

**Figure S10**

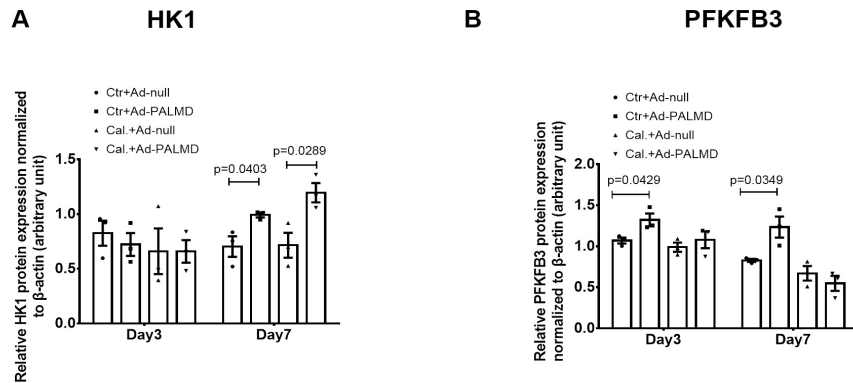

**Figure S10. Semi-quantitative analysis of the western blotting data presented in Figure 4D.** (A) HK1, n=3. (B) PFKFB3, n=3. Data are presented as mean  $\pm$  SEM, and statistical significance was analyzed by a two-tailed unpaired Student's t-test.

**Figure S11**

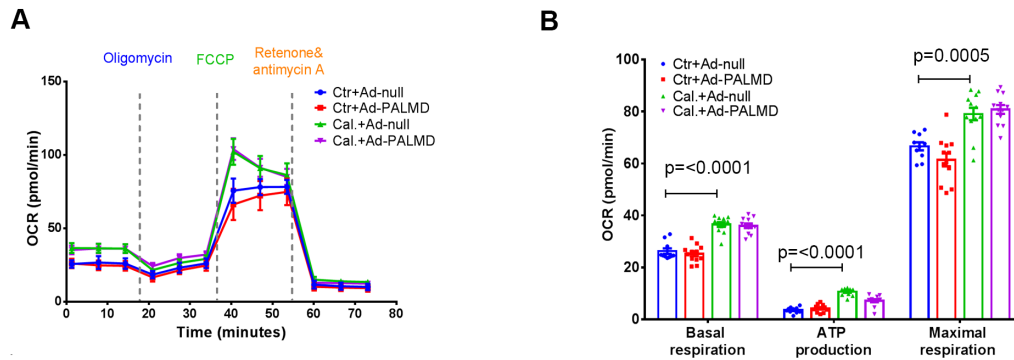

**Figure S11. PALMD overexpression did not alter oxidative phosphorylation in hVICs.** hVICs were infected with empty adenoviruses (Ad-null) or PALMD adenoviruses (Ad-PALMD) at an MOI of 100 for 48 hrs. (A-B) Oxygen consumption rate (OCR) in hVICs with PALMD overexpression in the presence of control (Ctr) or calcifying media for 48 hrs, n=12. Data are presented as mean  $\pm$  SEM, and statistical significance was analyzed by a two-tailed unpaired Student's t-test.

**Figure S12**

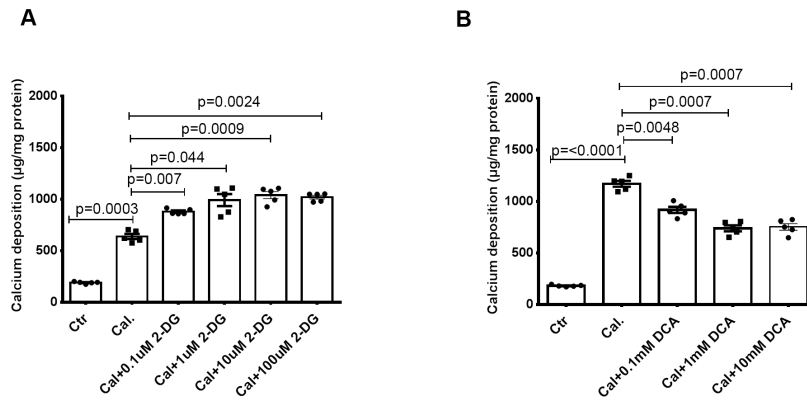

**Figure S12. The glycolysis inhibitor 2-DG and DCA induced opposite effects on hVIC calcification.** (A) hVICs were cultured with control (Ctrl) or calcification media (Cal.) with or without 2-DG (0-100 µM) for 7 days. Calcium quantitative analysis showed 2-DG increased hVIC *in vitro* calcification, n=5. (B) hVICs were cultured with control (Ctrl) or calcification media (Cal.) with or without DCA (0-100 mM) for 7 days. Calcium quantitative analysis showed DCA inhibited calcium deposition in hVICs at day 7, n=5. Data are presented as mean ± SEM, and statistical significance was analyzed by one-way ANOVA followed by Tukey's multiple comparisons test.

**Figure S13**

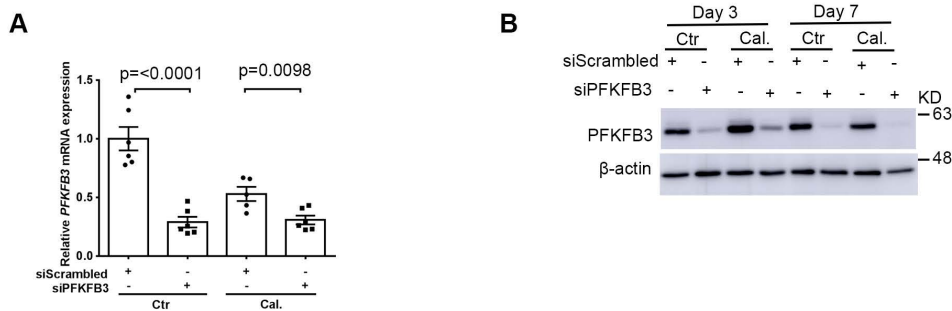

**Figure S13. Validation of siRNA-mediated PFKFB3 knockdown efficiency in hVICs.** hVICs were transfected with scrambled siRNA (siScrambled, 20 nM) or PFKFB3 siRNA (siPFKFB3, 20 nM) for 48 hrs. (A) RT-qPCR showing *PFKFB3* mRNA expression in hVICs, n=6. (B) Representative images of Western blotting for PFKFB3 and β-actin protein expression in hVICs. Data are presented as mean ± SEM, and statistical significance was analyzed by a two-tailed unpaired Student's t-test.

**Figure S14**

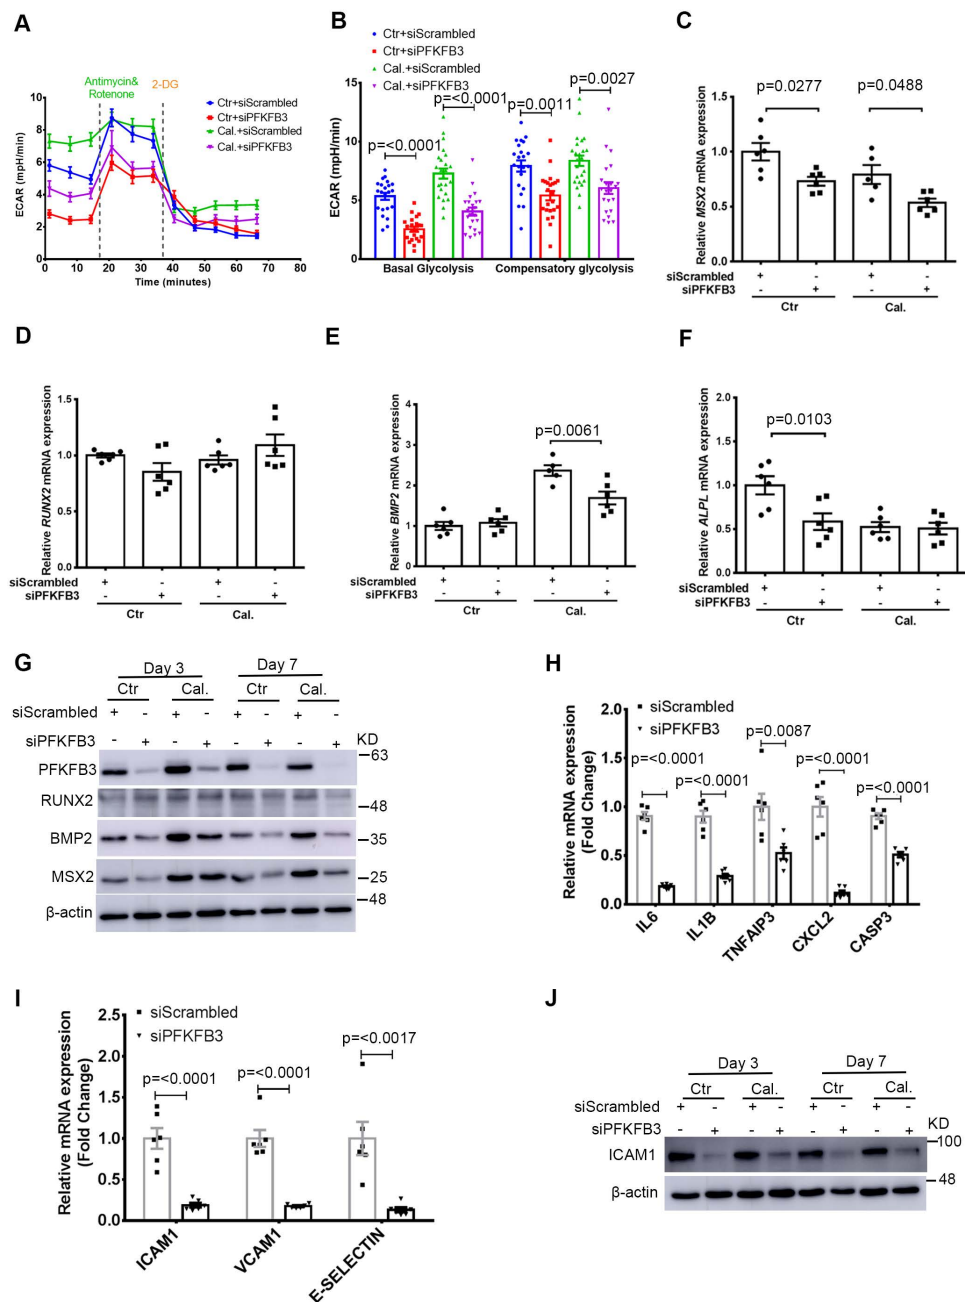

**Figure S14. Inhibition of PFKFB3-mediated glycolysis attenuates hVIC osteogenic differentiation and inflammation.** hVICs were transfected with scrambled siRNA (siScrambled, 20 nM) or PFKFB3 siRNA (siPFKFB3, 20 nM), and treated with control medium (Ctr) or calcifying medium (Cal.) for 48 hrs or for up to 7 days. (A-B) The glycolysis rate assay using the Seahorse in hVICs transfected with siScrambled or siPFKFB3 after 48 hrs, n=22. (C-F) RT-qPCR showing mRNA expression of the osteogenic gene *MSX2*, *RUNX2*, *BMP2* and *ALPL* in hVICs with depleted PFKFB3 at 48 hrs, n=6. (G) Representative images of Western blotting for *RUNX2*, *BMP2*, *MSX2* and  $\beta$ -actin protein expression in hVICs with depleted PFKFB3 at day 3 and day 7. Please note that these western blotting samples were the same batch of sample preparation used in Figure S13-B. We reused the PFKFB3 western blotting image here to show more clearly that PFKFB3 was successfully suppressed by siRNAs. (H) RT-qPCR showing mRNA expression of the inflammation-associated gene *IL6*, *IL1B*, *TNFAIP3*, *CXCL2*, and *CASP3* in hVICs with depleted PFKFB3 at 48 hrs, n=6. (I) RT-qPCR showing mRNA expression of the adhesion

molecule ICAM1, VCAM1, and E-SELECTIN in hVICs with depleted PFKFB3 at 48 hrs, n=6. (J) Representative images of Western blotting for ICAM1 and  $\beta$ -actin protein expression in hVICs with depleted PFKFB3 at day 3 and day 7. Data are presented as mean  $\pm$  SEM, and statistical significance was analyzed by a two-tailed unpaired Student's t-test or one-way ANOVA followed by Tukey's multiple comparisons test.

**Figure S15**

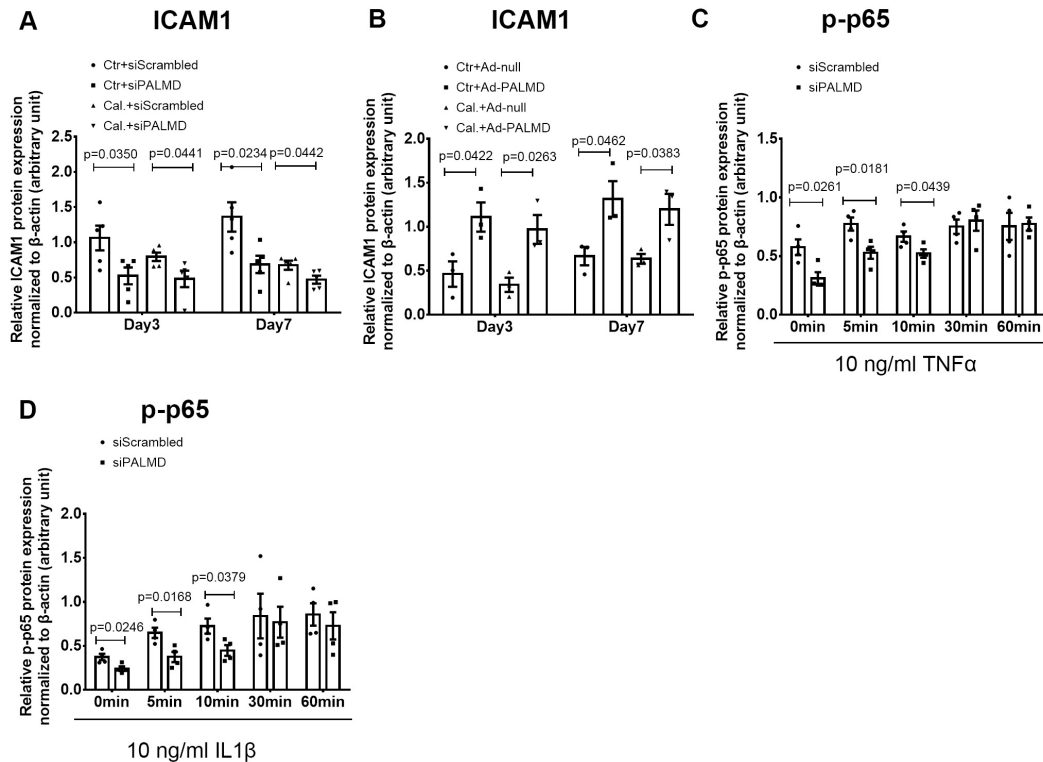

**Figure S15 Semi-quantitative analysis of the western blotting data presented in Figure 5D, G, H and I.** (A) ICAM1, n=5. (B) ICAM1, n=3. (C) p-p65, n=4. (D) p-p65, n=4. Data are presented as mean  $\pm$  SEM, and statistical significance was analyzed by a two-tailed unpaired Student's t-test.

**Figure S16**

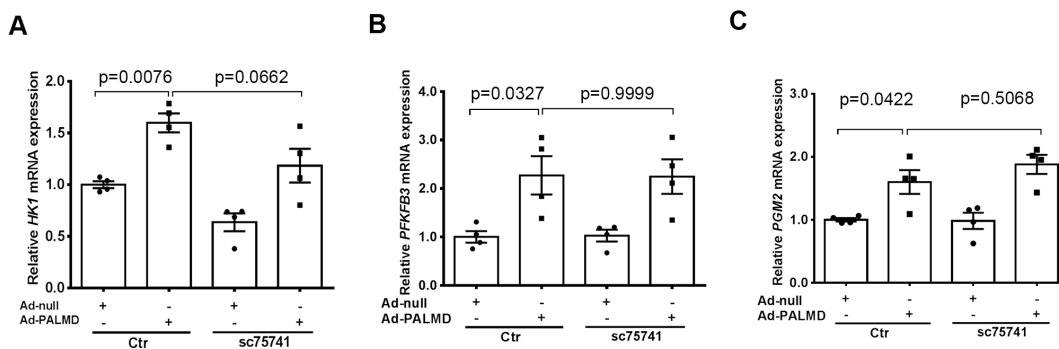

**Figure S16. Inhibition of NF- $\kappa$ B did not alter PALMD overexpression-induced the glycolytic gene expression in hVICs.** hVICs were infected with empty adenoviruses (Ad-null, MOI=100) or

PALMD adenoviruses (Ad-PALMD, MOI=100) and treated with 1 $\mu$ M the NF- $\kappa$ B inhibitor SC75741 for 48 hrs. (A-C) RT-qPCR showing mRNA expression of the key glycolytic gene *HK1*, *PFKFB3*, and *PGM2* in hVICs, n=4. Data are presented as mean  $\pm$  SEM, and statistical significance was analyzed by one-way ANOVA followed by Tukey's multiple comparisons test.

**Figure S17**

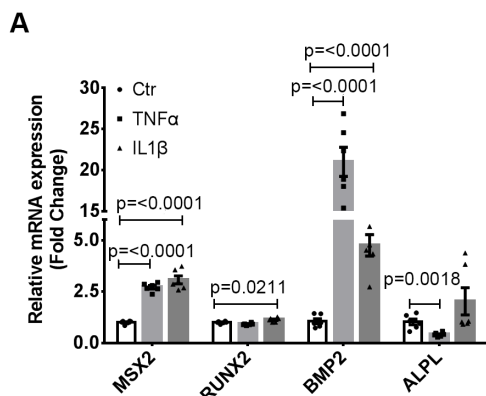

**Figure S17. TNF $\alpha$  and IL1 $\beta$  treatment induces osteogenic gene expression in hVICs.** hVICs were treated with 10 ng/ml TNF $\alpha$  or IL1 $\beta$  for 48 hrs. (A) RT-qPCR showing the osteogenic gene *MSX2*, *RUNX2*, *BMP2* and *ALPL* mRNA expression in hVICs, n=6. Data are presented as mean  $\pm$  SEM, and statistical significance was analyzed by a two-tailed unpaired Student's t-test or one-way ANOVA followed by Tukey's multiple comparisons test.

**Figure S18**

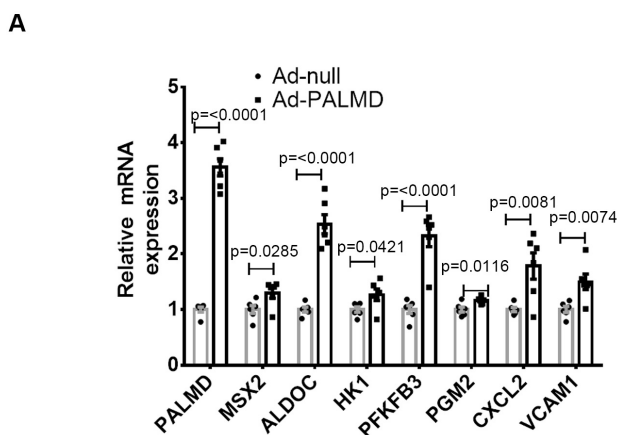

**Figure S18. Adenovirus-mediated overexpression of PALMD regulates the osteogenic, glycolytic and inflammatory gene expression in hVICs.** hVICs were transduced with Ad-PALMD at an MOI of 50 for 2 days, RT-qPCR was performed to examine mRNA expression of *PALMD*, *MSX2*, *ALDOC*, *HK1*, *PFKFB3*, *PGM2*, *CXCL2* and *VCAM1*, n=6. Data are presented as mean  $\pm$  SEM, and statistical significance was analyzed by a two-tailed unpaired Student's t-test.

Figure S19

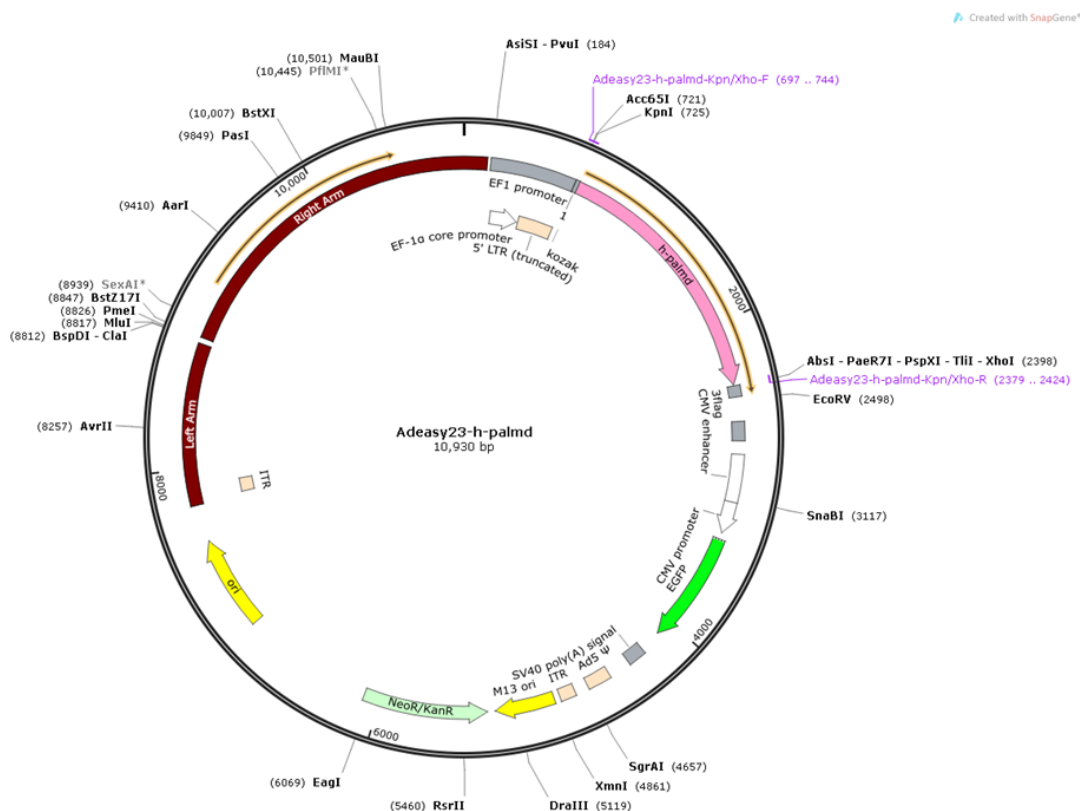

**Figure S19. The schematic of plasmid construction for PALMD overexpressing adenovirus.** Full length human PALMD was amplified using PCR and subcloned into the pAdEasy-EF1-MCS-3flag-CMV-GFP. The PCR primer sequence was sense: 5'-CAAGCTGTGACCGGCGCCTACTCTGGTACCGAGCTCGGATCCGCCACC-3' and antisense: 5'-GTCATCGTCATCCTTGTAGTCCTCGAGGATCACCTTTTTTCCCAGC-3'.

## Supporting Tables

**Table S1. Spreadsheet of differentially expressed gene list regulated by PALMD in hVICs identified by RNA-Seq, see supplemental excel file.**

### Up-regulated genes (siPALMD vs siScrambled)

| Annotation           |           |                | DE          | Statistic   |
|----------------------|-----------|----------------|-------------|-------------|
| Track_id             | Gene_Name | Gene_Type      | log2FC      | p_value     |
| ENSG00000137285.9_2  | TUBB2B    | protein_coding | 2.899818176 | 0.000130175 |
| ENSG00000143320.8_2  | CRABP2    | protein_coding | 2.486792063 | 1.68441E-05 |
| ENSG00000101255.10_3 | TRIB3     | protein_coding | 2.27103235  | 3.14683E-05 |
| ENSG00000123094.15_3 | RASSF8    | protein_coding | 1.991436391 | 0.000104429 |
| ENSG00000128165.8_2  | ADM2      | protein_coding | 1.919405044 | 0.000344728 |
| ENSG00000171951.4_3  | SCG2      | protein_coding | 1.915956262 | 5.09743E-05 |



|                      |          |                |             |             |
|----------------------|----------|----------------|-------------|-------------|
| ENSG00000284461.1_1  | RABGEF1  | protein_coding | 1.913210287 | 0.043133143 |
| ENSG00000135069.13_2 | PSAT1    | protein_coding | 1.863555524 | 1.00722E-05 |
| ENSG00000100889.11_2 | PCK2     | protein_coding | 1.778677992 | 9.49679E-06 |
| ENSG00000089597.16_2 | GANAB    | protein_coding | 1.727083853 | 2.45504E-05 |
| ENSG00000130513.6_3  | GDF15    | protein_coding | 1.666359898 | 4.4615E-06  |
| ENSG00000169105.7_2  | CHST14   | protein_coding | 1.660124342 | 2.41511E-06 |
| ENSG00000197457.9_2  | STMN3    | protein_coding | 1.632255467 | 6.19847E-06 |
| ENSG00000128965.11_2 | CHAC1    | protein_coding | 1.589281867 | 9.35048E-05 |
| ENSG00000070669.16_3 | ASNS     | protein_coding | 1.574849427 | 1.42747E-05 |
| ENSG00000144827.8_2  | ABHD10   | protein_coding | 1.544408981 | 0.001727832 |
| ENSG00000130766.4_2  | SESN2    | protein_coding | 1.52557269  | 2.45422E-05 |
| ENSG00000166128.12_2 | RAB8B    | protein_coding | 1.4978814   | 0.006946317 |
| ENSG00000136010.13_2 | ALDH1L2  | protein_coding | 1.353811083 | 2.63787E-05 |
| ENSG00000123689.5_2  | G0S2     | protein_coding | 1.350117205 | 0.001537314 |
| ENSG00000176490.4_3  | DIRAS1   | protein_coding | 1.3454103   | 5.15524E-05 |
| ENSG00000078018.19_3 | MAP2     | protein_coding | 1.343715663 | 0.003361034 |
| ENSG00000204291.10_2 | COL15A1  | protein_coding | 1.327581828 | 2.26541E-05 |
| ENSG00000144476.5_3  | ACKR3    | protein_coding | 1.326783258 | 1.02988E-06 |
| ENSG00000167460.14_4 | TPM4     | protein_coding | 1.325607756 | 0.001657832 |
| ENSG00000164898.12_3 | FMC1     | protein_coding | 1.296491547 | 0.001182677 |
| ENSG00000145391.13_2 | SETD7    | protein_coding | 1.248537893 | 1.92727E-05 |
| ENSG00000139514.12_3 | SLC7A1   | protein_coding | 1.244092067 | 3.96676E-05 |
| ENSG00000186832.8_3  | KRT16    | protein_coding | 1.233676669 | 5.43594E-05 |
| ENSG00000112378.11_2 | PERP     | protein_coding | 1.215476519 | 7.56121E-05 |
| ENSG00000127083.7_2  | OMD      | protein_coding | 1.214843139 | 9.46498E-05 |
| ENSG00000146476.10_2 | ARMT1    | protein_coding | 1.214643555 | 0.047171151 |
| ENSG00000117758.13_3 | STX12    | protein_coding | 1.213577149 | 2.14201E-05 |
| ENSG00000099875.14_3 | MKNK2    | protein_coding | 1.212132748 | 0.00041126  |
| ENSG00000105281.12_3 | SLC1A5   | protein_coding | 1.206207087 | 0.004944455 |
| ENSG00000174807.3_2  | CD248    | protein_coding | 1.20012413  | 9.14462E-05 |
| ENSG00000204604.9_3  | ZNF468   | protein_coding | 1.197397847 | 0.000584765 |
| ENSG00000284194.1_1  | SCO2     | protein_coding | 1.175906402 | 0.000653425 |
| ENSG00000166123.13_3 | GPT2     | protein_coding | 1.17275281  | 0.02271008  |
| ENSG00000137166.14_2 | FOXP4    | protein_coding | 1.169316984 | 9.00737E-06 |
| ENSG00000060491.16_3 | OGFR     | protein_coding | 1.155798663 | 3.98133E-05 |
| ENSG00000092621.12_3 | PHGDH    | protein_coding | 1.144694919 | 0.000259375 |
| ENSG00000057019.15_3 | DCBLD2   | protein_coding | 1.125257818 | 6.04191E-05 |
| ENSG00000181218.5_2  | HIST3H2A | protein_coding | 1.124107658 | 0.000604281 |
| ENSG00000104381.12_2 | GDAP1    | protein_coding | 1.122780687 | 0.000267577 |
| ENSG00000143537.13_3 | ADAM15   | protein_coding | 1.122214427 | 0.000173118 |
| ENSG00000185386.14_2 | MAPK11   | protein_coding | 1.109235461 | 0.00039309  |
| ENSG00000086062.12_2 | B4GALT1  | protein_coding | 1.109035689 | 1.32908E-06 |
| ENSG00000155254.12_2 | MARVELD1 | protein_coding | 1.098045813 | 7.893E-06   |
| ENSG00000156639.11_2 | ZFAND3   | protein_coding | 1.093573823 | 1.84974E-05 |

|                      |              |                |             |             |
|----------------------|--------------|----------------|-------------|-------------|
| ENSG00000165806.19_3 | CASP7        | protein_coding | 1.089396662 | 0.000152882 |
| ENSG00000135842.16_2 | FAM129A      | protein_coding | 1.087878401 | 0.000249982 |
| ENSG00000140367.11_3 | UBE2Q2       | protein_coding | 1.081715886 | 0.000103416 |
| ENSG00000181588.16_3 | MEX3D        | protein_coding | 1.070335754 | 0.001064146 |
| ENSG00000143367.15_3 | TUFT1        | protein_coding | 1.066495282 | 0.030459787 |
| ENSG00000116761.11_2 | CTH          | protein_coding | 1.065968404 | 4.13255E-06 |
| ENSG00000185567.6_2  | AHNAK2       | protein_coding | 1.06388933  | 0.000297061 |
| ENSG00000188223.9_4  | AD000671.1   | protein_coding | 1.051654846 | 0.043554433 |
| ENSG00000012963.14_3 | UBR7         | protein_coding | 1.051269227 | 0.040651991 |
| ENSG00000157613.10_3 | CREB3L1      | protein_coding | 1.051059928 | 0.000335097 |
| ENSG00000130635.15_3 | COL5A1       | protein_coding | 1.050528974 | 0.000627994 |
| ENSG00000153574.8_2  | RPIA         | protein_coding | 1.047188517 | 0.00039141  |
| ENSG00000179195.15_3 | ZNF664       | protein_coding | 1.045882633 | 1.22872E-06 |
| ENSG00000058091.16_3 | CDK14        | protein_coding | 1.038873737 | 0.000121731 |
| ENSG00000105327.17_3 | BBC3         | protein_coding | 1.038646623 | 0.00056501  |
| ENSG00000153879.8_2  | CEBPG        | protein_coding | 1.029122015 | 5.74471E-05 |
| ENSG00000117298.14_2 | ECE1         | protein_coding | 1.026803911 | 7.06924E-06 |
| ENSG00000176971.3_2  | FIBIN        | protein_coding | 1.022825068 | 0.000135138 |
| ENSG00000164932.12_2 | CTHRC1       | protein_coding | 1.022782986 | 4.08327E-06 |
| ENSG00000234444.9_3  | ZNF736       | protein_coding | 1.016392773 | 0.007818677 |
| ENSG00000144583.4_2  | MARCH4       | protein_coding | 1.012325117 | 3.50535E-05 |
| ENSG00000157693.14_2 | TMEM268      | protein_coding | 1.006145136 | 0.004205411 |
| ENSG00000173281.4_2  | PPP1R3B      | protein_coding | 1.005801552 | 0.000509413 |
| ENSG00000168542.14_3 | COL3A1       | protein_coding | 1.003046823 | 0.000222432 |
| ENSG00000183098.10_2 | GPC6         | protein_coding | 1.002812418 | 6.11513E-05 |
| ENSG00000177374.12_4 | HIC1         | protein_coding | 0.995402478 | 0.000531916 |
| ENSG00000169136.10_3 | ATF5         | protein_coding | 0.99218785  | 0.002539038 |
| ENSG00000171307.18_2 | ZDHHC16      | protein_coding | 0.989031428 | 0.000327595 |
| ENSG00000088256.8_2  | GNA11        | protein_coding | 0.986128362 | 0.014528274 |
| ENSG00000135048.13_4 | TMEM2        | protein_coding | 0.983824899 | 0.005532864 |
| ENSG00000049540.16_3 | ELN          | protein_coding | 0.981933298 | 0.000898098 |
| ENSG00000117899.10_4 | MESD         | protein_coding | 0.979109761 | 0.000598695 |
| ENSG00000029364.11_2 | SLC39A9      | protein_coding | 0.977233133 | 0.007321663 |
| ENSG00000114786.16_4 | ABHD14A-ACY1 | protein_coding | 0.975064982 | 0.022947936 |
| ENSG00000204439.3_2  | C6orf47      | protein_coding | 0.966423274 | 0.00118198  |
| ENSG00000104964.14_2 | AES          | protein_coding | 0.963417149 | 5.36457E-05 |
| ENSG00000104679.10_4 | R3HCC1       | protein_coding | 0.963160949 | 0.004020215 |
| ENSG00000146674.14_3 | IGFBP3       | protein_coding | 0.957451455 | 5.11029E-05 |
| ENSG00000037241.7_3  | RPL26L1      | protein_coding | 0.953233679 | 0.001413679 |
| ENSG00000123131.12_2 | PRDX4        | protein_coding | 0.945532645 | 0.002902146 |
| ENSG00000154930.14_2 | ACSS1        | protein_coding | 0.943731339 | 4.49469E-05 |
| ENSG00000181788.3_2  | SIAH2        | protein_coding | 0.943468204 | 0.000154507 |
| ENSG00000065911.11_2 | MTHFD2       | protein_coding | 0.943353093 | 0.002820232 |
| ENSG00000124702.17_2 | KLHDC3       | protein_coding | 0.940552    | 5.33749E-05 |

|                      |          |                |             |             |
|----------------------|----------|----------------|-------------|-------------|
| ENSG00000106105.13_2 | GARS     | protein_coding | 0.93968834  | 3.33649E-05 |
| ENSG00000179292.4_2  | TMEM151A | protein_coding | 0.932852152 | 1.66736E-05 |
| ENSG00000137573.13_3 | SULF1    | protein_coding | 0.932739921 | 0.001944368 |
| ENSG00000196975.15_2 | ANXA4    | protein_coding | 0.932622022 | 7.48959E-06 |
| ENSG00000143878.9_2  | RHOB     | protein_coding | 0.929116526 | 0.00011057  |
| ENSG00000197136.4_3  | PCNX3    | protein_coding | 0.927549436 | 0.000962809 |
| ENSG00000124098.9_2  | FAM210B  | protein_coding | 0.92703612  | 0.000175179 |
| ENSG00000080573.6_2  | COL5A3   | protein_coding | 0.924610175 | 0.000933102 |
| ENSG00000147883.10_2 | CDKN2B   | protein_coding | 0.921496539 | 1.86994E-05 |
| ENSG00000223496.2_3  | EXOSC6   | protein_coding | 0.918154593 | 1.08556E-05 |
| ENSG00000164106.7_2  | SCRG1    | protein_coding | 0.916430855 | 0.000336665 |
| ENSG00000161714.11_3 | PLCD3    | protein_coding | 0.913571997 | 2.33326E-05 |
| ENSG00000265972.5_2  | TXNIP    | protein_coding | 0.912779326 | 0.00670096  |
| ENSG00000168209.4_2  | DDIT4    | protein_coding | 0.908396156 | 0.001528417 |
| ENSG00000163815.5_3  | CLEC3B   | protein_coding | 0.906787982 | 0.000402825 |
| ENSG00000108639.7_3  | SYNGR2   | protein_coding | 0.903419476 | 0.045145031 |
| ENSG00000122203.14_2 | KIAA1191 | protein_coding | 0.903268704 | 0.00029446  |
| ENSG00000161920.9_2  | MED11    | protein_coding | 0.900889164 | 8.55278E-05 |
| ENSG00000172201.11_3 | ID4      | protein_coding | 0.900564899 | 8.59211E-05 |
| ENSG00000184939.15_2 | ZFP90    | protein_coding | 0.898590575 | 0.021762109 |
| ENSG00000154978.12_2 | VOPPI    | protein_coding | 0.897541659 | 0.000355853 |
| ENSG00000189184.11_2 | PCDH18   | protein_coding | 0.897134274 | 0.000954867 |
| ENSG00000127774.6_2  | EMC6     | protein_coding | 0.890391945 | 2.55321E-05 |
| ENSG00000115109.13_2 | EPB41L5  | protein_coding | 0.890059111 | 0.008447819 |
| ENSG00000186283.13_3 | TOR3A    | protein_coding | 0.888055891 | 6.11211E-06 |
| ENSG00000133169.5_2  | BEX1     | protein_coding | 0.888047341 | 0.001649616 |
| ENSG00000106819.11_2 | ASPN     | protein_coding | 0.887485817 | 0.000147102 |
| ENSG00000103257.8_2  | SLC7A5   | protein_coding | 0.887460998 | 1.00338E-05 |
| ENSG00000171700.13_2 | RGS19    | protein_coding | 0.887384213 | 0.000662545 |
| ENSG00000117862.11_3 | TXNDC12  | protein_coding | 0.884794984 | 1.17431E-06 |
| ENSG00000133110.14_2 | POSTN    | protein_coding | 0.883108175 | 0.000553216 |
| ENSG00000132613.14_2 | MTSS1L   | protein_coding | 0.880345591 | 0.000110134 |
| ENSG00000074416.13_4 | MGLL     | protein_coding | 0.878831264 | 1.62905E-05 |
| ENSG00000130956.13_2 | HABP4    | protein_coding | 0.875907882 | 0.000247346 |
| ENSG00000143816.7_2  | WNT9A    | protein_coding | 0.875203844 | 0.000616902 |
| ENSG00000123728.9_2  | RAP2C    | protein_coding | 0.874816641 | 0.001073068 |
| ENSG00000135480.15_3 | KRT7     | protein_coding | 0.873824483 | 0.002822993 |
| ENSG00000118898.15_3 | PPL      | protein_coding | 0.872688153 | 0.034143248 |
| ENSG00000188783.5_2  | PRELP    | protein_coding | 0.86241938  | 1.56097E-05 |
| ENSG00000106070.17_3 | GRB10    | protein_coding | 0.860629934 | 6.23988E-05 |
| ENSG00000100216.5_2  | TOMM22   | protein_coding | 0.855410047 | 0.000389128 |
| ENSG00000140044.12_2 | JDP2     | protein_coding | 0.851519989 | 0.016702644 |
| ENSG00000160200.17_2 | CBS      | protein_coding | 0.847473843 | 0.019306549 |
| ENSG00000163536.12_2 | SERPINI1 | protein_coding | 0.842543985 | 0.000305106 |

|                      |          |                |             |             |
|----------------------|----------|----------------|-------------|-------------|
| ENSG0000005243.9_3   | COPZ2    | protein_coding | 0.841848625 | 0.000189237 |
| ENSG00000100360.14_3 | IFT27    | protein_coding | 0.841009    | 0.042308072 |
| ENSG00000068383.18_2 | INPP5A   | protein_coding | 0.839038017 | 2.77248E-05 |
| ENSG00000111801.15_3 | BTN3A3   | protein_coding | 0.838706388 | 0.00130237  |
| ENSG00000166224.16_3 | SGPL1    | protein_coding | 0.838045528 | 9.48516E-05 |
| ENSG00000031698.12_2 | SARS     | protein_coding | 0.837279811 | 0.000208771 |
| ENSG00000025772.7_2  | TOMM34   | protein_coding | 0.832920182 | 7.99175E-06 |
| ENSG00000101098.12_2 | RIMS4    | protein_coding | 0.83056818  | 0.000959091 |
| ENSG00000086827.8_3  | ZW10     | protein_coding | 0.828657877 | 0.001271278 |
| ENSG00000162755.13_2 | KLHDC9   | protein_coding | 0.827772133 | 0.004452426 |
| ENSG00000167969.12_2 | ECI1     | protein_coding | 0.825274229 | 0.000185063 |
| ENSG00000162104.9_2  | ADCY9    | protein_coding | 0.822507529 | 0.000492651 |
| ENSG00000198513.11_2 | ATL1     | protein_coding | 0.819104873 | 0.001420734 |
| ENSG00000154957.13_3 | ZNF18    | protein_coding | 0.817501204 | 0.000923622 |
| ENSG00000243646.9_3  | IL10RB   | protein_coding | 0.814655957 | 0.047632318 |
| ENSG00000187049.9_2  | TMEM216  | protein_coding | 0.81352817  | 0.00069562  |
| ENSG00000175395.15_2 | ZNF25    | protein_coding | 0.813261321 | 4.72932E-05 |
| ENSG0000012171.19_3  | SEMA3B   | protein_coding | 0.812209123 | 0.008650354 |
| ENSG00000105058.11_2 | FAM32A   | protein_coding | 0.811078495 | 6.78649E-05 |
| ENSG00000167994.11_3 | RAB3IL1  | protein_coding | 0.810696203 | 0.002467132 |
| ENSG00000155158.20_4 | TTC39B   | protein_coding | 0.807156633 | 0.000499521 |
| ENSG00000196670.13_3 | ZFP62    | protein_coding | 0.806089289 | 0.013538525 |
| ENSG00000119392.14_2 | GLE1     | protein_coding | 0.80134323  | 0.001444391 |
| ENSG00000124145.6_3  | SDC4     | protein_coding | 0.80001216  | 7.87118E-06 |
| ENSG00000171100.14_2 | MTM1     | protein_coding | 0.798145883 | 1.7043E-05  |
| ENSG00000204611.6_3  | ZNF616   | protein_coding | 0.796471303 | 9.96431E-05 |
| ENSG00000102225.15_3 | CDK16    | protein_coding | 0.79185917  | 0.012637006 |
| ENSG0000015676.17_2  | NUDCD3   | protein_coding | 0.789522766 | 3.48755E-05 |
| ENSG00000113721.13_2 | PDGFRB   | protein_coding | 0.786117481 | 0.000453006 |
| ENSG00000125869.9_2  | LAMP5    | protein_coding | 0.785876382 | 0.001941671 |
| ENSG00000146966.12_2 | DENND2A  | protein_coding | 0.784690455 | 6.33387E-06 |
| ENSG00000075643.5_3  | MOCOS    | protein_coding | 0.782454685 | 5.43062E-05 |
| ENSG00000148180.19_3 | GSN      | protein_coding | 0.779893722 | 0.000120184 |
| ENSG00000159792.9_2  | PSKH1    | protein_coding | 0.775622607 | 4.90925E-05 |
| ENSG00000121552.3_2  | CSTA     | protein_coding | 0.774081845 | 0.004435745 |
| ENSG00000128567.16_2 | PODXL    | protein_coding | 0.772512795 | 7.51362E-05 |
| ENSG00000196136.17_3 | SERPINA3 | protein_coding | 0.771918272 | 0.002373732 |
| ENSG00000144468.16_3 | RHBDD1   | protein_coding | 0.769831446 | 0.000122155 |
| ENSG00000170214.4_3  | ADRA1B   | protein_coding | 0.765094728 | 0.001884441 |
| ENSG00000154065.16_2 | ANKRD29  | protein_coding | 0.764827607 | 1.59013E-05 |
| ENSG00000109084.13_2 | TMEM97   | protein_coding | 0.764745521 | 0.017912497 |
| ENSG00000154175.16_3 | ABI3BP   | protein_coding | 0.76244745  | 4.88079E-05 |
| ENSG00000114631.10_3 | PODXL2   | protein_coding | 0.760476535 | 0.001215234 |
| ENSG00000132530.16_3 | XAF1     | protein_coding | 0.759660979 | 0.000521657 |

|                      |           |                |             |             |
|----------------------|-----------|----------------|-------------|-------------|
| ENSG0000090861.15_3  | AARS      | protein_coding | 0.755527201 | 0.000311136 |
| ENSG00000196365.11_2 | LONP1     | protein_coding | 0.755390519 | 0.002370729 |
| ENSG00000100412.15_2 | ACO2      | protein_coding | 0.7545623   | 0.000679268 |
| ENSG00000169116.11_2 | PARM1     | protein_coding | 0.754562071 | 1.43884E-05 |
| ENSG00000132563.15_3 | REEP2     | protein_coding | 0.75382181  | 0.037810813 |
| ENSG00000187151.7_3  | ANGPTL5   | protein_coding | 0.753502221 | 0.002663263 |
| ENSG00000171160.17_2 | MORN4     | protein_coding | 0.753231588 | 0.000831311 |
| ENSG00000185585.19_3 | OLFML2A   | protein_coding | 0.753103165 | 0.002463293 |
| ENSG00000176438.12_2 | SYNE3     | protein_coding | 0.752370193 | 3.03317E-05 |
| ENSG00000174564.12_3 | IL20RB    | protein_coding | 0.75142219  | 0.000898647 |
| ENSG00000167779.7_2  | IGFBP6    | protein_coding | 0.750067169 | 0.000788775 |
| ENSG00000187840.4_2  | EIF4EBP1  | protein_coding | 0.748374586 | 0.000333926 |
| ENSG00000179954.15_3 | SSC5D     | protein_coding | 0.747522928 | 1.91696E-05 |
| ENSG00000107863.17_3 | ARHGAP21  | protein_coding | 0.743952859 | 0.028015342 |
| ENSG00000185963.13_2 | BICD2     | protein_coding | 0.743553547 | 3.30489E-05 |
| ENSG00000187325.4_2  | TAF9B     | protein_coding | 0.742518246 | 0.000772236 |
| ENSG00000102996.4_2  | MMP15     | protein_coding | 0.741929652 | 0.000329449 |
| ENSG00000183010.16_3 | PYCR1     | protein_coding | 0.741790883 | 0.000324146 |
| ENSG00000140265.12_2 | ZSCAN29   | protein_coding | 0.740448481 | 0.000550805 |
| ENSG00000177363.4_2  | LRRN4CL   | protein_coding | 0.735303319 | 0.001048188 |
| ENSG00000124523.15_3 | SIRT5     | protein_coding | 0.732406925 | 6.23984E-05 |
| ENSG00000158373.8_3  | HIST1H2BD | protein_coding | 0.732404034 | 0.002083634 |
| ENSG00000133816.13_3 | MICAL2    | protein_coding | 0.730957435 | 0.012234481 |
| ENSG00000065833.8_2  | ME1       | protein_coding | 0.730428454 | 0.000485356 |
| ENSG00000107798.17_3 | LIPA      | protein_coding | 0.730353899 | 2.16052E-05 |
| ENSG00000060982.14_2 | BCAT1     | protein_coding | 0.730168303 | 0.000253877 |
| ENSG00000129009.12_3 | ISLR      | protein_coding | 0.727602494 | 0.000376622 |
| ENSG00000187239.16_2 | FNBP1     | protein_coding | 0.725014739 | 2.50843E-06 |
| ENSG00000074935.13_2 | TUBE1     | protein_coding | 0.724459727 | 2.54254E-05 |
| ENSG00000170624.13_2 | SGCD      | protein_coding | 0.72434134  | 0.001339373 |
| ENSG00000172845.14_2 | SP3       | protein_coding | 0.722578157 | 0.000304159 |
| ENSG00000115884.10_2 | SDC1      | protein_coding | 0.716827048 | 0.000231197 |
| ENSG00000129925.10_2 | TMEM8A    | protein_coding | 0.716478491 | 9.48265E-06 |
| ENSG00000175197.11_3 | DDIT3     | protein_coding | 0.715990922 | 0.032597728 |
| ENSG00000272325.1_3  | NUDT3     | protein_coding | 0.714965116 | 0.004931558 |
| ENSG00000154359.12_2 | LONRF1    | protein_coding | 0.714415452 | 0.000212844 |
| ENSG00000168672.3_2  | FAM84B    | protein_coding | 0.712069014 | 0.000383281 |
| ENSG00000148468.16_2 | FAM171A1  | protein_coding | 0.709058584 | 8.95812E-05 |
| ENSG00000164237.8_2  | CMBL      | protein_coding | 0.707369474 | 0.000499888 |
| ENSG00000138772.12_3 | ANXA3     | protein_coding | 0.706908016 | 7.48217E-06 |
| ENSG00000182400.14_3 | TRAPPC6B  | protein_coding | 0.706556875 | 0.000208448 |
| ENSG00000176953.12_4 | NFATC2IP  | protein_coding | 0.705571602 | 0.044285498 |
| ENSG00000187605.15_2 | TET3      | protein_coding | 0.705503833 | 0.000630511 |
| ENSG00000189060.5_2  | H1FO      | protein_coding | 0.704342962 | 0.000173128 |

|                      |            |                |             |             |
|----------------------|------------|----------------|-------------|-------------|
| ENSG00000254692.1_4  | AL136295.1 | protein_coding | 0.694169757 | 0.033241395 |
| ENSG00000120053.10_2 | GOT1       | protein_coding | 0.692799974 | 6.20954E-05 |
| ENSG00000124249.6_3  | KCNK15     | protein_coding | 0.692560251 | 0.005255664 |
| ENSG00000256043.2_2  | CTSO       | protein_coding | 0.691776045 | 4.51676E-05 |
| ENSG00000115129.13_2 | TP53I3     | protein_coding | 0.691256296 | 0.000226921 |
| ENSG00000240303.7_3  | ACAD11     | protein_coding | 0.690873867 | 0.000127334 |
| ENSG00000107821.14_2 | KAZALD1    | protein_coding | 0.689245823 | 0.000310545 |
| ENSG00000171552.12_3 | BCL2L1     | protein_coding | 0.688962322 | 0.000823731 |
| ENSG0000014919.12_2  | COX15      | protein_coding | 0.688843857 | 2.99887E-06 |
| ENSG00000165312.6_2  | OTUD1      | protein_coding | 0.687439416 | 0.001954855 |
| ENSG00000189129.13_2 | PLAC9      | protein_coding | 0.687183913 | 0.001019942 |
| ENSG00000163071.10_2 | SPATA18    | protein_coding | 0.686496844 | 0.000557557 |
| ENSG00000042493.15_2 | CAPG       | protein_coding | 0.686397019 | 2.18954E-06 |
| ENSG00000070061.14_3 | ELP1       | protein_coding | 0.685595791 | 0.000431272 |
| ENSG00000103653.16_3 | CSK        | protein_coding | 0.684759387 | 0.001246672 |
| ENSG00000198121.13_3 | LPAR1      | protein_coding | 0.684377889 | 0.000488404 |
| ENSG00000102572.14_3 | STK24      | protein_coding | 0.684036341 | 0.002296846 |
| ENSG00000183479.8    | TREX2      | protein_coding | 0.682045323 | 0.003815659 |
| ENSG00000106823.12_3 | ECM2       | protein_coding | 0.681335582 | 8.20616E-06 |
| ENSG00000120820.12_2 | GLT8D2     | protein_coding | 0.680011645 | 7.66562E-05 |
| ENSG00000175390.13_3 | EIF3F      | protein_coding | 0.678778612 | 0.001098454 |
| ENSG00000182168.14_2 | UNC5C      | protein_coding | 0.678085237 | 0.001729523 |
| ENSG00000112936.18_2 | C7         | protein_coding | 0.676976798 | 7.67511E-05 |
| ENSG00000152779.13_3 | SLC16A12   | protein_coding | 0.675657348 | 0.000244323 |
| ENSG00000139899.10_2 | CBLN3      | protein_coding | 0.674254076 | 0.000105193 |
| ENSG00000021762.19_3 | OSBPL5     | protein_coding | 0.673065816 | 0.000799217 |
| ENSG00000150764.13_3 | DIXDC1     | protein_coding | 0.672214544 | 0.000234375 |
| ENSG00000117153.15_3 | KLHL12     | protein_coding | 0.671710426 | 0.000434186 |
| ENSG00000071282.11_2 | LMCD1      | protein_coding | 0.67156883  | 0.014206351 |
| ENSG00000185624.14_2 | P4HB       | protein_coding | 0.671339915 | 0.001680288 |
| ENSG00000033327.12_3 | GAB2       | protein_coding | 0.670040198 | 0.002006645 |
| ENSG00000177283.7_3  | FZD8       | protein_coding | 0.668770439 | 0.000794403 |
| ENSG00000011201.11_3 | ANOS1      | protein_coding | 0.668353175 | 0.000509465 |
| ENSG00000142046.14_3 | TMEM91     | protein_coding | 0.668117453 | 0.038108078 |
| ENSG00000179772.7_2  | FOXS1      | protein_coding | 0.667876713 | 0.001733408 |
| ENSG00000165698.15_3 | SPACA9     | protein_coding | 0.66655589  | 0.004788478 |
| ENSG00000204219.9_2  | TCEA3      | protein_coding | 0.666186605 | 0.000611915 |
| ENSG00000140931.19_3 | CMTM3      | protein_coding | 0.664758289 | 0.007517401 |
| ENSG00000267952.1_4  | AC008878.1 | protein_coding | 0.663130819 | 0.031816198 |
| ENSG00000167110.17_3 | GOLGA2     | protein_coding | 0.662049849 | 7.56361E-05 |
| ENSG00000047932.13_3 | GOPC       | protein_coding | 0.661846517 | 0.001030043 |
| ENSG00000168077.13_2 | SCARA3     | protein_coding | 0.66102998  | 0.000151156 |
| ENSG00000079156.16_2 | OSBPL6     | protein_coding | 0.65898181  | 5.55389E-05 |
| ENSG00000172992.11_2 | DCAKD      | protein_coding | 0.658160955 | 0.000135485 |

|                      |          |                |             |             |
|----------------------|----------|----------------|-------------|-------------|
| ENSG00000144566.10_3 | RAB5A    | protein_coding | 0.657909317 | 0.000404209 |
| ENSG00000197930.12_3 | ERO1A    | protein_coding | 0.656354531 | 0.000378686 |
| ENSG00000154813.9_2  | DPH3     | protein_coding | 0.654991308 | 0.00119591  |
| ENSG00000198380.12_2 | GFPT1    | protein_coding | 0.654413945 | 0.000268423 |
| ENSG00000187955.11_2 | COL14A1  | protein_coding | 0.654410578 | 0.001615857 |
| ENSG00000166197.16_3 | NOLC1    | protein_coding | 0.652695004 | 0.024007448 |
| ENSG00000168495.12_3 | POLR3D   | protein_coding | 0.651310251 | 0.000770357 |
| ENSG00000143196.4_2  | DPT      | protein_coding | 0.651099702 | 0.004063104 |
| ENSG00000196182.10_2 | STK40    | protein_coding | 0.650885632 | 0.000219445 |
| ENSG00000130309.10_4 | COLGALT1 | protein_coding | 0.650294782 | 0.000104285 |
| ENSG00000111816.7_2  | FRK      | protein_coding | 0.649720377 | 0.000375826 |
| ENSG00000185437.13_3 | SH3BGR   | protein_coding | 0.648541406 | 0.002623696 |
| ENSG00000157227.12_2 | MMP14    | protein_coding | 0.648343132 | 0.000906219 |
| ENSG00000168994.13_2 | PXDC1    | protein_coding | 0.646641245 | 0.002235544 |
| ENSG00000103512.14_3 | NOMO1    | protein_coding | 0.646381907 | 0.000117748 |
| ENSG00000112769.18_3 | LAMA4    | protein_coding | 0.646210538 | 0.000283336 |
| ENSG00000184014.7_3  | DENND5A  | protein_coding | 0.645173184 | 0.000455677 |
| ENSG00000164402.13_4 | SEPT8    | protein_coding | 0.644497064 | 0.000474279 |
| ENSG00000247315.3_2  | ZCCHC3   | protein_coding | 0.642904828 | 0.000359434 |
| ENSG00000112759.16_2 | SLC29A1  | protein_coding | 0.64261856  | 0.000642604 |
| ENSG00000164253.13_4 | WDR41    | protein_coding | 0.642336121 | 2.44294E-05 |
| ENSG00000109436.7_3  | TBC1D9   | protein_coding | 0.642170156 | 0.000287264 |
| ENSG00000138757.14_2 | G3BP2    | protein_coding | 0.641497567 | 0.017708485 |
| ENSG00000155111.14_3 | CDK19    | protein_coding | 0.641303161 | 0.001243923 |
| ENSG00000197093.10_2 | GAL3ST4  | protein_coding | 0.640270314 | 0.037501607 |
| ENSG00000175906.4_2  | ARL4D    | protein_coding | 0.637983074 | 0.006406003 |
| ENSG00000076356.6_2  | PLXNA2   | protein_coding | 0.637244628 | 0.000517655 |
| ENSG00000111817.16_3 | DSE      | protein_coding | 0.636877224 | 0.000867438 |
| ENSG00000164823.9_2  | OSGIN2   | protein_coding | 0.636627374 | 2.3539E-05  |
| ENSG00000087303.17_3 | NID2     | protein_coding | 0.636429797 | 0.000492726 |
| ENSG00000077684.15_3 | JADE1    | protein_coding | 0.634128355 | 0.030323512 |
| ENSG00000114853.13_2 | ZBTB47   | protein_coding | 0.633713865 | 0.001151219 |
| ENSG00000250067.11_3 | YJEFN3   | protein_coding | 0.633370073 | 0.009681573 |
| ENSG00000166173.10_3 | LARP6    | protein_coding | 0.631747454 | 0.001453858 |
| ENSG00000063245.14_3 | EPN1     | protein_coding | 0.631734256 | 0.000360583 |
| ENSG00000138413.13_2 | IDH1     | protein_coding | 0.631729511 | 0.00024937  |
| ENSG00000143971.7_2  | ETAA1    | protein_coding | 0.629233761 | 0.000622396 |
| ENSG00000188811.13_3 | NHLRC3   | protein_coding | 0.628933576 | 1.57168E-06 |
| ENSG00000120656.11_2 | TAF12    | protein_coding | 0.628922746 | 0.032073369 |
| ENSG00000232859.9_3  | LYRM9    | protein_coding | 0.627011609 | 4.18203E-05 |
| ENSG00000186377.7_2  | CYP4X1   | protein_coding | 0.626228105 | 0.002035288 |
| ENSG00000117543.20_3 | DPH5     | protein_coding | 0.625178112 | 0.007521113 |
| ENSG00000111450.13_3 | STX2     | protein_coding | 0.625103836 | 4.81636E-05 |
| ENSG00000166797.10_2 | FAM96A   | protein_coding | 0.624719322 | 0.001051689 |

|                      |          |                |             |             |
|----------------------|----------|----------------|-------------|-------------|
| ENSG00000136026.13_3 | CKAP4    | protein_coding | 0.623842183 | 0.000162643 |
| ENSG00000143387.12_2 | CTSK     | protein_coding | 0.623617918 | 0.003975088 |
| ENSG00000138061.11_3 | CYP1B1   | protein_coding | 0.623410962 | 0.002023117 |
| ENSG00000162976.12_2 | PQLC3    | protein_coding | 0.621752424 | 0.022164316 |
| ENSG00000138623.9_3  | SEMA7A   | protein_coding | 0.621210859 | 0.000409678 |
| ENSG00000196284.15_4 | SUPT3H   | protein_coding | 0.61932536  | 0.001345464 |
| ENSG00000101311.15_2 | FERMT1   | protein_coding | 0.618976364 | 1.04802E-05 |
| ENSG00000124786.9_2  | SLC35B3  | protein_coding | 0.618903345 | 0.000254911 |
| ENSG00000163393.12_2 | SLC22A15 | protein_coding | 0.618676217 | 0.00061812  |
| ENSG00000088280.18_3 | ASAP3    | protein_coding | 0.618066148 | 0.000297523 |
| ENSG00000185164.10   | NOMO2    | protein_coding | 0.617034012 | 1.2137E-05  |
| ENSG00000121057.12_3 | AKAP1    | protein_coding | 0.616677797 | 0.02867769  |
| ENSG00000066117.14_2 | SMARCD1  | protein_coding | 0.613676928 | 0.013086878 |
| ENSG00000133195.11_3 | SLC39A11 | protein_coding | 0.612906215 | 0.000571065 |
| ENSG00000145545.11_2 | SRD5A1   | protein_coding | 0.610160877 | 0.003998333 |
| ENSG00000165661.16_3 | QSOX2    | protein_coding | 0.607604293 | 0.003454953 |
| ENSG00000185483.11_2 | ROR1     | protein_coding | 0.60686039  | 5.37881E-05 |
| ENSG00000075239.13_2 | ACAT1    | protein_coding | 0.606451811 | 3.98814E-05 |
| ENSG00000001461.16_2 | NIPAL3   | protein_coding | 0.606021006 | 4.76745E-05 |
| ENSG00000186889.9_3  | TMEM17   | protein_coding | 0.605909911 | 0.000400985 |
| ENSG00000167074.14_2 | TEF      | protein_coding | 0.605647496 | 0.000349639 |
| ENSG00000119681.11_3 | LTBP2    | protein_coding | 0.605458344 | 0.002992261 |
| ENSG00000119699.7_2  | TGFB3    | protein_coding | 0.603694406 | 0.000240679 |
| ENSG00000196562.14_3 | SULF2    | protein_coding | 0.603487681 | 0.003453815 |
| ENSG00000205978.5_2  | NYNRIN   | protein_coding | 0.603037344 | 0.000886138 |
| ENSG00000133466.13_2 | C1QTNF6  | protein_coding | 0.602703727 | 6.8759E-05  |
| ENSG00000109089.7_2  | CDR2L    | protein_coding | 0.601801389 | 0.000384239 |
| ENSG00000138768.14_3 | USO1     | protein_coding | 0.601628821 | 4.30603E-05 |
| ENSG00000140105.17_3 | WARS     | protein_coding | 0.601125977 | 0.009651498 |
| ENSG00000100246.12_3 | DNAL4    | protein_coding | 0.601112472 | 0.004352994 |
| ENSG00000136628.17_2 | EPRS     | protein_coding | 0.599818734 | 2.18691E-05 |
| ENSG00000116584.17_3 | ARHGEF2  | protein_coding | 0.59929021  | 0.002457169 |
| ENSG00000165804.15_3 | ZNF219   | protein_coding | 0.59924415  | 0.001704725 |
| ENSG00000150281.6_2  | CTF1     | protein_coding | 0.598972    | 0.002655804 |
| ENSG00000263465.4_2  | SRSF8    | protein_coding | 0.598888429 | 0.000348072 |
| ENSG00000144231.10_3 | POLR2D   | protein_coding | 0.59824761  | 0.002873071 |
| ENSG00000102886.14_2 | GDPD3    | protein_coding | 0.597717102 | 0.002258695 |
| ENSG00000182809.10_2 | CRIP2    | protein_coding | 0.597550602 | 0.000124975 |
| ENSG00000175414.6_3  | ARL10    | protein_coding | 0.597359878 | 9.88689E-06 |
| ENSG00000174738.12_2 | NR1D2    | protein_coding | 0.596696227 | 7.86148E-05 |
| ENSG00000099377.13_3 | HSD3B7   | protein_coding | 0.595607662 | 0.001758445 |
| ENSG00000127528.5_2  | KLF2     | protein_coding | 0.595405893 | 0.000293816 |
| ENSG00000100138.13_2 | SNU13    | protein_coding | 0.593950613 | 0.045611331 |
| ENSG00000095383.19_2 | TBC1D2   | protein_coding | 0.593935722 | 0.014098193 |



|                      |            |                |             |             |
|----------------------|------------|----------------|-------------|-------------|
| ENSG00000101052.12_2 | IFT52      | protein_coding | 0.593031634 | 0.000544425 |
| ENSG00000187098.14_3 | MITF       | protein_coding | 0.590088576 | 0.039807887 |
| ENSG00000134590.13_3 | RTL8C      | protein_coding | 0.589935269 | 0.03727062  |
| ENSG0000023608.4_3   | SNAPC1     | protein_coding | 0.589720402 | 0.000327223 |
| ENSG00000198538.10_3 | ZNF28      | protein_coding | 0.589458653 | 0.008928998 |
| ENSG00000126603.8_2  | GLIS2      | protein_coding | 0.589170809 | 0.000550615 |
| ENSG00000106080.10_2 | FKBP14     | protein_coding | 0.589022868 | 0.00188278  |
| ENSG00000106683.14_2 | LIMK1      | protein_coding | 0.587837192 | 4.85274E-05 |
| ENSG00000079150.17_2 | FKBP7      | protein_coding | 0.587575008 | 0.00108472  |
| ENSG00000157168.18_1 | NRG1       | protein_coding | 0.586925922 | 0.003905507 |
| ENSG00000183889.12_4 | AC138969.1 | protein_coding | 0.586799825 | 0.013160193 |
| ENSG00000196305.17_3 | IARS       | protein_coding | 0.586742616 | 0.001246922 |
| ENSG00000142871.16_3 | CYR61      | protein_coding | 0.585057428 | 0.000397652 |

### Down-regulated genes (siPALMD vs siScrambled)

| Annotation           |           |                | DE          | Statistic   |
|----------------------|-----------|----------------|-------------|-------------|
| Track_id             | Gene_Name | Gene_Type      | log2FC      | p_value     |
| ENSG00000152952.11_2 | PLOD2     | protein_coding | -2.86293756 | 9.06264E-07 |
| ENSG00000102158.19_2 | MAGT1     | protein_coding | -2.08821818 | 1.74435E-06 |
| ENSG00000117152.13_2 | RGS4      | protein_coding | -2.0274694  | 0.027407324 |
| ENSG00000139921.12_2 | TMX1      | protein_coding | -1.88016391 | 3.95532E-06 |
| ENSG00000113369.8_2  | ARRDC3    | protein_coding | -1.86272291 | 7.13887E-06 |
| ENSG00000136244.11_3 | IL6       | protein_coding | -1.69844461 | 0.000775013 |
| ENSG00000158270.11_3 | COLEC12   | protein_coding | -1.66723856 | 7.84803E-08 |
| ENSG00000143870.12_3 | PDIA6     | protein_coding | -1.66423617 | 3.68071E-05 |
| ENSG00000186479.4_2  | RGS7BP    | protein_coding | -1.6238444  | 0.000194663 |
| ENSG00000142166.12_3 | IFNAR1    | protein_coding | -1.59249996 | 1.12624E-06 |
| ENSG00000139132.14_3 | FGD4      | protein_coding | -1.58784292 | 0.008591588 |
| ENSG00000144959.9_3  | NCEH1     | protein_coding | -1.57724256 | 0.000268467 |
| ENSG00000112902.11_3 | SEMA5A    | protein_coding | -1.51866446 | 8.04165E-05 |
| ENSG00000186310.9_3  | NAP1L3    | protein_coding | -1.5152978  | 1.68852E-06 |
| ENSG00000197632.8_3  | SERPINB2  | protein_coding | -1.49553388 | 0.002181303 |
| ENSG00000163659.12_3 | TIPARP    | protein_coding | -1.45725787 | 0.00031039  |
| ENSG00000141429.13_3 | GALNT1    | protein_coding | -1.45093121 | 0.006261528 |
| ENSG00000099260.10_2 | PALMD     | protein_coding | -1.43530104 | 0.000118258 |
| ENSG00000143815.14_3 | LBR       | protein_coding | -1.43034887 | 3.57094E-05 |
| ENSG00000151422.12_3 | FER       | protein_coding | -1.42569959 | 0.002929752 |
| ENSG00000141574.7_4  | SECTM1    | protein_coding | -1.39784903 | 0.000179999 |
| ENSG00000111276.10_3 | CDKN1B    | protein_coding | -1.36592901 | 6.55204E-06 |
| ENSG0000011426.10_3  | ANLN      | protein_coding | -1.35843995 | 2.10674E-05 |
| ENSG00000214194.8_4  | SMIM30    | protein_coding | -1.35802116 | 0.00078282  |
| ENSG00000115274.14_3 | INO80B    | protein_coding | -1.35454749 | 0.004075923 |
| ENSG00000115738.9_2  | ID2       | protein_coding | -1.35367847 | 0.017192273 |

|                      |          |                |             |             |
|----------------------|----------|----------------|-------------|-------------|
| ENSG00000181751.9_2  | C5orf30  | protein_coding | -1.34544334 | 2.1097E-06  |
| ENSG00000131747.14_2 | TOP2A    | protein_coding | -1.30091112 | 9.2955E-05  |
| ENSG00000125965.8_2  | GDF5     | protein_coding | -1.2970864  | 3.50586E-05 |
| ENSG00000061676.14_2 | NCKAP1   | protein_coding | -1.27408742 | 1.33571E-05 |
| ENSG00000160307.9_2  | S100B    | protein_coding | -1.26704701 | 0.000220472 |
| ENSG00000118971.7_3  | CCND2    | protein_coding | -1.26059061 | 0.000101254 |
| ENSG00000013297.10_3 | CLDN11   | protein_coding | -1.25785862 | 0.001107445 |
| ENSG00000198431.15_3 | TXNRD1   | protein_coding | -1.24742927 | 0.012937492 |
| ENSG00000189067.12_3 | LITAF    | protein_coding | -1.23616667 | 0.023633326 |
| ENSG00000112308.12_2 | C6orf62  | protein_coding | -1.23457405 | 2.31249E-06 |
| ENSG00000118503.14_3 | TNFAIP3  | protein_coding | -1.23240368 | 0.000257499 |
| ENSG00000152133.14_2 | GPATCH11 | protein_coding | -1.21260144 | 1.22198E-05 |
| ENSG00000163293.11_3 | NIPAL1   | protein_coding | -1.2011278  | 0.000875546 |
| ENSG00000172399.5_2  | MYOZ2    | protein_coding | -1.19039619 | 0.001235901 |
| ENSG00000073737.16_3 | DHRS9    | protein_coding | -1.18605999 | 6.17671E-05 |
| ENSG00000116962.14_2 | NID1     | protein_coding | -1.1812164  | 4.20219E-06 |
| ENSG00000072952.18_3 | MRVI1    | protein_coding | -1.18075381 | 6.06286E-05 |
| ENSG00000170113.15_4 | NIPA1    | protein_coding | -1.16924895 | 0.000819731 |
| ENSG00000131389.16_2 | SLC6A6   | protein_coding | -1.16722432 | 8.71241E-05 |
| ENSG00000153956.15_2 | CACNA2D1 | protein_coding | -1.16449806 | 0.000277177 |
| ENSG00000125148.6_2  | MT2A     | protein_coding | -1.1634358  | 0.000205598 |
| ENSG00000151474.21_3 | FRMD4A   | protein_coding | -1.15822575 | 3.69983E-05 |
| ENSG00000181019.12_2 | NQO1     | protein_coding | -1.15573727 | 2.67418E-05 |
| ENSG00000100697.14_2 | DICER1   | protein_coding | -1.15359065 | 0.001129352 |
| ENSG00000164466.12_3 | SFXN1    | protein_coding | -1.15205179 | 2.38969E-05 |
| ENSG00000065485.19_3 | PDIA5    | protein_coding | -1.13520706 | 7.54764E-05 |
| ENSG00000154734.14_4 | ADAMTS1  | protein_coding | -1.13501299 | 2.52605E-05 |
| ENSG00000140961.12_3 | OSGIN1   | protein_coding | -1.1286728  | 0.000547102 |
| ENSG00000175274.18_4 | TP53I11  | protein_coding | -1.12771611 | 0.010114457 |
| ENSG00000164114.18_3 | MAP9     | protein_coding | -1.11753402 | 1.2487E-05  |
| ENSG00000137033.11_2 | IL33     | protein_coding | -1.1162228  | 0.001948578 |
| ENSG00000068305.17_3 | MEF2A    | protein_coding | -1.10942011 | 0.000464964 |
| ENSG00000134291.11_2 | TMEM106C | protein_coding | -1.10507248 | 0.002643005 |
| ENSG00000134333.13_3 | LDHA     | protein_coding | -1.10266491 | 0.001379304 |
| ENSG00000123975.4_2  | CKS2     | protein_coding | -1.10065233 | 0.006507842 |
| ENSG00000004864.13_2 | SLC25A13 | protein_coding | -1.09879013 | 8.68314E-06 |
| ENSG00000113739.10_2 | STC2     | protein_coding | -1.09366138 | 3.75772E-05 |
| ENSG00000064393.15_2 | HIPK2    | protein_coding | -1.0929059  | 0.000110888 |
| ENSG00000123485.11_3 | HJURP    | protein_coding | -1.09103671 | 0.001097712 |
| ENSG00000119950.20_4 | MXI1     | protein_coding | -1.0888804  | 0.044756437 |
| ENSG00000116717.11_2 | GADD45A  | protein_coding | -1.08577922 | 0.00031651  |
| ENSG00000164687.10_2 | FABP5    | protein_coding | -1.08391292 | 0.000621137 |
| ENSG00000182985.17_3 | CADM1    | protein_coding | -1.07498677 | 0.001038704 |
| ENSG00000071967.11_2 | CYBRD1   | protein_coding | -1.07488533 | 0.000174383 |

|                      |              |                |             |             |
|----------------------|--------------|----------------|-------------|-------------|
| ENSG0000024526.16_3  | DEPDC1       | protein_coding | -1.06423137 | 0.000626322 |
| ENSG00000167695.14_2 | FAM57A       | protein_coding | -1.0582906  | 0.03164808  |
| ENSG00000154310.16_3 | TNIK         | protein_coding | -1.05412651 | 2.74547E-05 |
| ENSG00000145675.14_2 | PIK3R1       | protein_coding | -1.05278813 | 0.009457626 |
| ENSG00000170266.15_3 | GLB1         | protein_coding | -1.05274509 | 0.003053027 |
| ENSG00000112984.11_3 | KIF20A       | protein_coding | -1.04703477 | 0.000304117 |
| ENSG00000139734.17_3 | DIAPH3       | protein_coding | -1.04452656 | 8.87327E-06 |
| ENSG00000158164.6_2  | TMSB15A      | protein_coding | -1.04111076 | 0.006699008 |
| ENSG00000068489.12_3 | PRR11        | protein_coding | -1.04080942 | 0.000351373 |
| ENSG00000141526.16_3 | SLC16A3      | protein_coding | -1.03762665 | 0.000251439 |
| ENSG00000117399.13_2 | CDC20        | protein_coding | -1.03523083 | 0.000421673 |
| ENSG00000198743.6_3  | SLC5A3       | protein_coding | -1.03421395 | 0.000682204 |
| ENSG00000104368.17_3 | PLAT         | protein_coding | -1.02795009 | 0.000515857 |
| ENSG00000170571.11_2 | EMB          | protein_coding | -1.02267524 | 3.83644E-05 |
| ENSG00000081041.8_2  | CXCL2        | protein_coding | -1.01547238 | 0.005343847 |
| ENSG00000165757.8_3  | JCAD         | protein_coding | -1.01369898 | 8.46998E-05 |
| ENSG00000118777.10_3 | ABCG2        | protein_coding | -1.01280635 | 0.000799986 |
| ENSG00000125538.11_3 | IL1B         | protein_coding | -1.01093546 | 0.000196716 |
| ENSG00000082153.17_3 | BZW1         | protein_coding | -1.01070953 | 0.014577908 |
| ENSG00000157600.11_2 | TMEM164      | protein_coding | -0.98823306 | 0.049425926 |
| ENSG00000090889.11_2 | KIF4A        | protein_coding | -0.98604573 | 0.000160786 |
| ENSG00000082482.13_3 | KCNK2        | protein_coding | -0.98157733 | 0.002454842 |
| ENSG00000198961.9_2  | PJA2         | protein_coding | -0.97583946 | 7.63521E-05 |
| ENSG00000067955.13_3 | CBFB         | protein_coding | -0.97221492 | 0.025073195 |
| ENSG00000196616.13_2 | ADH1B        | protein_coding | -0.97023537 | 0.000537074 |
| ENSG00000134668.12_3 | SPOCD1       | protein_coding | -0.96832988 | 0.000183787 |
| ENSG00000106853.18_3 | PTGR1        | protein_coding | -0.96282207 | 0.000408145 |
| ENSG00000107159.12_2 | CA9          | protein_coding | -0.95863966 | 0.000293369 |
| ENSG00000164761.8_2  | TNFRSF11B    | protein_coding | -0.957875   | 0.000128008 |
| ENSG00000198642.6_3  | KLHL9        | protein_coding | -0.9562934  | 9.44497E-05 |
| ENSG00000139832.4_2  | RAB20        | protein_coding | -0.95144147 | 4.93995E-05 |
| ENSG00000162972.10_3 | MAIP1        | protein_coding | -0.94988013 | 0.001965711 |
| ENSG00000118705.16_3 | RPN2         | protein_coding | -0.94622231 | 5.33155E-05 |
| ENSG00000274810.4_3  | NPHP3-ACAD11 | protein_coding | -0.94551795 | 0.000456829 |
| ENSG00000196083.9_3  | IL1RAP       | protein_coding | -0.9451511  | 0.031842836 |
| ENSG00000163814.7_3  | CDCP1        | protein_coding | -0.94296554 | 1.70082E-05 |
| ENSG00000112144.15_2 | ICK          | protein_coding | -0.94270161 | 5.93777E-05 |
| ENSG00000132718.8_2  | SYT11        | protein_coding | -0.93908095 | 7.14515E-06 |
| ENSG00000108602.17_3 | ALDH3A1      | protein_coding | -0.93903495 | 0.00059009  |
| ENSG00000139531.12_2 | SUOX         | protein_coding | -0.93290382 | 0.005839977 |
| ENSG00000161011.19_3 | SQSTM1       | protein_coding | -0.93151288 | 2.09221E-05 |
| ENSG00000184254.16_3 | ALDH1A3      | protein_coding | -0.92839702 | 0.000377707 |
| ENSG00000185127.6_2  | C6orf120     | protein_coding | -0.92651837 | 9.57162E-05 |
| ENSG00000109511.11_3 | ANXA10       | protein_coding | -0.92280014 | 0.00015173  |

|                      |            |                |             |             |
|----------------------|------------|----------------|-------------|-------------|
| ENSG00000065613.13_3 | SLK        | protein_coding | -0.92177796 | 0.00010621  |
| ENSG00000087586.17_2 | AURKA      | protein_coding | -0.91025673 | 0.00082434  |
| ENSG00000136108.14_4 | CKAP2      | protein_coding | -0.90939573 | 0.01478978  |
| ENSG00000133983.14_3 | COX16      | protein_coding | -0.90830103 | 0.003099215 |
| ENSG00000176170.13_2 | SPHK1      | protein_coding | -0.90496521 | 0.0291286   |
| ENSG00000146678.9_2  | IGFBP1     | protein_coding | -0.90319719 | 0.006085247 |
| ENSG00000135914.5_2  | HTR2B      | protein_coding | -0.89622302 | 0.00045987  |
| ENSG00000271793.1_4  | AL589666.1 | protein_coding | -0.89580105 | 0.001192966 |
| ENSG00000198053.11_2 | SIRPA      | protein_coding | -0.88810022 | 1.48264E-05 |
| ENSG00000134057.14_3 | CCNB1      | protein_coding | -0.88695899 | 7.12721E-05 |
| ENSG00000081087.14_3 | OSTM1      | protein_coding | -0.88386821 | 0.000172022 |
| ENSG00000183688.4_3  | RFLNB      | protein_coding | -0.88250313 | 0.000876752 |
| ENSG00000174720.15_3 | LARP7      | protein_coding | -0.88000451 | 0.001133888 |
| ENSG00000117724.12_2 | CENPF      | protein_coding | -0.87826538 | 0.000154292 |
| ENSG00000196154.11_3 | S100A4     | protein_coding | -0.87793811 | 0.000197667 |
| ENSG00000100644.16_3 | HIF1A      | protein_coding | -0.87534032 | 0.007789105 |
| ENSG00000213694.3_3  | S1PR3      | protein_coding | -0.87277875 | 0.000675455 |
| ENSG00000102531.16_3 | FNDC3A     | protein_coding | -0.87213907 | 0.000727202 |
| ENSG00000143847.15_2 | PPFIA4     | protein_coding | -0.86718606 | 0.000678579 |
| ENSG00000109107.13_3 | ALDOC      | protein_coding | -0.86158054 | 7.11051E-05 |
| ENSG00000147124.12_2 | ZNF41      | protein_coding | -0.86096706 | 0.011852059 |
| ENSG00000106771.12_2 | TMEM245    | protein_coding | -0.86006574 | 2.10804E-06 |
| ENSG00000170425.3_2  | ADORA2B    | protein_coding | -0.85812485 | 0.000511897 |
| ENSG00000198959.11_2 | TGM2       | protein_coding | -0.85775025 | 4.46579E-05 |
| ENSG00000170312.15_2 | CDK1       | protein_coding | -0.85238689 | 0.003900149 |
| ENSG00000196611.4_2  | MMP1       | protein_coding | -0.85060205 | 0.026640596 |
| ENSG00000116285.12_2 | ERRFI1     | protein_coding | -0.84803969 | 0.00013408  |
| ENSG00000185112.5_2  | FAM43A     | protein_coding | -0.84616752 | 0.001302714 |
| ENSG00000139874.5_3  | SSTR1      | protein_coding | -0.84438863 | 2.44903E-05 |
| ENSG00000167900.11_2 | TK1        | protein_coding | -0.84304629 | 0.045448416 |
| ENSG00000075218.18_2 | GTSE1      | protein_coding | -0.8421246  | 0.001338963 |
| ENSG00000176171.11_2 | BNIP3      | protein_coding | -0.8415313  | 7.73285E-05 |
| ENSG00000186480.12_3 | INSIG1     | protein_coding | -0.84038617 | 0.000872812 |
| ENSG00000001561.6_2  | ENPP4      | protein_coding | -0.83930333 | 0.000395444 |
| ENSG00000139278.9_3  | GLIPR1     | protein_coding | -0.83887085 | 0.006030879 |
| ENSG00000135776.4_2  | ABCB10     | protein_coding | -0.83470616 | 0.000180886 |
| ENSG00000138385.15_2 | SSB        | protein_coding | -0.83300176 | 0.000221377 |
| ENSG00000173960.13_3 | UBXN2A     | protein_coding | -0.83262622 | 8.34797E-05 |
| ENSG00000118418.14_3 | HMGN3      | protein_coding | -0.82913972 | 2.66751E-05 |
| ENSG00000111652.9_2  | COPS7A     | protein_coding | -0.82425563 | 0.000127095 |
| ENSG00000154553.13_2 | PDLIM3     | protein_coding | -0.82096686 | 8.74503E-06 |
| ENSG00000138944.7_2  | KIAA1644   | protein_coding | -0.81901349 | 6.86528E-05 |
| ENSG00000162849.15_3 | KIF26B     | protein_coding | -0.81875533 | 0.012311075 |
| ENSG00000128585.17_3 | MKLN1      | protein_coding | -0.81754977 | 0.039901295 |

|                      |          |                |             |             |
|----------------------|----------|----------------|-------------|-------------|
| ENSG0000067167.7_2   | TRAM1    | protein_coding | -0.80879949 | 0.000215035 |
| ENSG00000124164.15_2 | VAPB     | protein_coding | -0.80778523 | 0.000219738 |
| ENSG00000113595.14_3 | TRIM23   | protein_coding | -0.80768341 | 4.18114E-05 |
| ENSG0000066855.15_2  | MTFR1    | protein_coding | -0.80569503 | 0.000250479 |
| ENSG00000138180.15_2 | CEP55    | protein_coding | -0.80562761 | 0.000323733 |
| ENSG00000153214.9_3  | TMEM87B  | protein_coding | -0.80562056 | 0.000109626 |
| ENSG00000196843.15_2 | ARID5A   | protein_coding | -0.80198772 | 6.92785E-05 |
| ENSG00000084070.11_3 | SMAP2    | protein_coding | -0.80110458 | 0.001831762 |
| ENSG00000111057.10_3 | KRT18    | protein_coding | -0.80069673 | 0.000224445 |
| ENSG00000146411.5_2  | SLC2A12  | protein_coding | -0.80038527 | 0.001305658 |
| ENSG00000072210.18_3 | ALDH3A2  | protein_coding | -0.80018911 | 0.001768746 |
| ENSG00000144136.10_3 | SLC20A1  | protein_coding | -0.79998467 | 5.92578E-05 |
| ENSG00000104687.12_3 | GSR      | protein_coding | -0.79588822 | 4.27124E-05 |
| ENSG00000143401.14_4 | ANP32E   | protein_coding | -0.79467934 | 0.014196365 |
| ENSG00000119314.15_3 | PTBP3    | protein_coding | -0.79442172 | 0.00149932  |
| ENSG00000151150.21_3 | ANK3     | protein_coding | -0.79196106 | 0.000669047 |
| ENSG00000083099.10_2 | LYRM2    | protein_coding | -0.79172536 | 3.87458E-05 |
| ENSG00000084734.8_3  | GCKR     | protein_coding | -0.7917225  | 0.001238035 |
| ENSG00000176788.8_3  | BASP1    | protein_coding | -0.789553   | 1.14616E-05 |
| ENSG00000146376.10_2 | ARHGAP18 | protein_coding | -0.78670857 | 0.000202206 |
| ENSG00000105810.9_2  | CDK6     | protein_coding | -0.78621755 | 0.000138876 |
| ENSG00000121989.14_2 | ACVR2A   | protein_coding | -0.78000364 | 0.000256043 |
| ENSG00000113441.15_3 | LNPEP    | protein_coding | -0.7799721  | 0.000199872 |
| ENSG00000249242.7_3  | TMEM150C | protein_coding | -0.77774057 | 0.000639728 |
| ENSG00000111231.8_2  | GPN3     | protein_coding | -0.77660777 | 0.003915383 |
| ENSG00000143228.12_3 | NUF2     | protein_coding | -0.77640864 | 0.003011126 |
| ENSG00000171033.12_2 | PKIA     | protein_coding | -0.77596423 | 0.000378565 |
| ENSG00000137364.4_2  | TPMT     | protein_coding | -0.77353832 | 3.00313E-05 |
| ENSG00000243927.5_3  | MRPS6    | protein_coding | -0.76858057 | 0.000500837 |
| ENSG00000148730.6_2  | EIF4EBP2 | protein_coding | -0.7669465  | 9.31199E-05 |
| ENSG00000164305.18_3 | CASP3    | protein_coding | -0.76393348 | 8.0941E-05  |
| ENSG00000167772.11_3 | ANGPTL4  | protein_coding | -0.76235944 | 0.005927138 |
| ENSG00000140836.15_4 | ZFHX3    | protein_coding | -0.76216344 | 0.000205329 |
| ENSG00000170293.8_3  | CMTM8    | protein_coding | -0.75965917 | 0.012880036 |
| ENSG00000043093.13_3 | DCUN1D1  | protein_coding | -0.75939331 | 0.001282279 |
| ENSG00000129521.13_3 | EGLN3    | protein_coding | -0.75933622 | 4.22513E-06 |
| ENSG00000169607.12_2 | CKAP2L   | protein_coding | -0.75890566 | 0.001372839 |
| ENSG00000137710.14_3 | RDX      | protein_coding | -0.75860313 | 0.001126865 |
| ENSG00000126787.12_3 | DLGAP5   | protein_coding | -0.75511947 | 2.12722E-05 |
| ENSG00000113594.9_2  | LIFR     | protein_coding | -0.75349179 | 9.69366E-05 |
| ENSG00000064932.15_2 | SBNO2    | protein_coding | -0.74958842 | 0.002966599 |
| ENSG00000180233.10_3 | ZNRF2    | protein_coding | -0.74834556 | 0.000127552 |
| ENSG00000153561.12_2 | RMND5A   | protein_coding | -0.74667949 | 4.47963E-05 |
| ENSG00000139211.6_2  | AMIGO2   | protein_coding | -0.74250891 | 0.00354974  |

|                      |          |                |             |             |
|----------------------|----------|----------------|-------------|-------------|
| ENSG00000101447.14_2 | FAM83D   | protein_coding | -0.74190695 | 0.003894621 |
| ENSG00000157368.10_2 | IL34     | protein_coding | -0.74190159 | 0.000654126 |
| ENSG00000102144.13_2 | PGK1     | protein_coding | -0.74123336 | 1.46549E-05 |
| ENSG00000198900.5_2  | TOP1     | protein_coding | -0.74071219 | 0.000268873 |
| ENSG00000115009.11_2 | CCL20    | protein_coding | -0.7368326  | 0.003805466 |
| ENSG00000067334.13_2 | DNTTIP2  | protein_coding | -0.73679812 | 0.028485452 |
| ENSG00000085063.14_3 | CD59     | protein_coding | -0.73346897 | 0.019900884 |
| ENSG00000110422.11_3 | HIPK3    | protein_coding | -0.73110597 | 0.02931224  |
| ENSG00000056050.6_3  | HPF1     | protein_coding | -0.73010367 | 0.000963343 |
| ENSG00000067225.17_4 | PKM      | protein_coding | -0.72705862 | 0.039458753 |
| ENSG00000183607.9_2  | GKN2     | protein_coding | -0.7265667  | 0.006924077 |
| ENSG00000112096.16_3 | SOD2     | protein_coding | -0.72528382 | 0.002960793 |
| ENSG00000159164.9_2  | SV2A     | protein_coding | -0.72345649 | 0.00015581  |
| ENSG00000148053.15_2 | NTRK2    | protein_coding | -0.72304183 | 0.000318348 |
| ENSG00000101182.14_3 | PSMA7    | protein_coding | -0.72047949 | 0.000981384 |
| ENSG00000111669.14_2 | TPI1     | protein_coding | -0.71631711 | 0.000411819 |
| ENSG00000125730.16_3 | C3       | protein_coding | -0.71392367 | 0.000121944 |
| ENSG00000183496.5_2  | MEX3B    | protein_coding | -0.7138164  | 0.000437715 |
| ENSG00000237649.7_2  | KIFC1    | protein_coding | -0.71337319 | 0.001135009 |
| ENSG00000145284.11_2 | SCD5     | protein_coding | -0.71331158 | 6.70585E-05 |
| ENSG00000163249.11_3 | CCNYL1   | protein_coding | -0.70751859 | 6.86193E-05 |
| ENSG00000187134.13_3 | AKR1C1   | protein_coding | -0.70611333 | 0.003062014 |
| ENSG00000221869.4_2  | CEBPD    | protein_coding | -0.70555792 | 0.000256636 |
| ENSG00000138778.11_2 | CENPE    | protein_coding | -0.70447961 | 0.000628861 |
| ENSG00000168615.11_2 | ADAM9    | protein_coding | -0.7037952  | 0.001092064 |
| ENSG00000170873.18_3 | MTSS1    | protein_coding | -0.70353988 | 0.002564277 |
| ENSG00000163376.11_2 | KBTBD8   | protein_coding | -0.70264399 | 0.048006902 |
| ENSG00000166923.10_2 | GREM1    | protein_coding | -0.70154276 | 0.02498665  |
| ENSG00000170522.9_2  | ELOVL6   | protein_coding | -0.70061756 | 0.000497946 |
| ENSG00000185883.11_3 | ATP6V0C  | protein_coding | -0.69962931 | 0.002228063 |
| ENSG00000143363.15_3 | PRUNE1   | protein_coding | -0.69923347 | 0.045650789 |
| ENSG00000136021.18_2 | SCYL2    | protein_coding | -0.6962901  | 0.000208803 |
| ENSG00000169429.10_2 | CXCL8    | protein_coding | -0.69622489 | 0.011964477 |
| ENSG00000136231.13_2 | IGF2BP3  | protein_coding | -0.69617477 | 0.000402793 |
| ENSG00000101974.14_2 | ATP11C   | protein_coding | -0.69614623 | 0.00022571  |
| ENSG00000116747.12_3 | TROVE2   | protein_coding | -0.69396783 | 0.000504861 |
| ENSG00000164611.12_2 | PTTG1    | protein_coding | -0.69301271 | 0.008042732 |
| ENSG00000134013.15_3 | LOXL2    | protein_coding | -0.69189557 | 0.000442756 |
| ENSG00000072062.13_2 | PRKACA   | protein_coding | -0.69058382 | 9.31578E-05 |
| ENSG00000126860.11_3 | EVI2A    | protein_coding | -0.69039923 | 0.046411544 |
| ENSG00000143924.18_2 | EML4     | protein_coding | -0.6866296  | 0.000366766 |
| ENSG00000172340.14_3 | SUCLG2   | protein_coding | -0.68593832 | 1.64022E-05 |
| ENSG00000183048.11_3 | SLC25A10 | protein_coding | -0.6855418  | 0.006882301 |
| ENSG00000108691.9_2  | CCL2     | protein_coding | -0.68464604 | 0.007307484 |

|                      |          |                |             |             |
|----------------------|----------|----------------|-------------|-------------|
| ENSG00000113361.12_3 | CDH6     | protein_coding | -0.68409376 | 0.001289964 |
| ENSG00000163481.7_3  | RNF25    | protein_coding | -0.6839254  | 0.002041583 |
| ENSG00000151468.10_4 | CCDC3    | protein_coding | -0.68375726 | 0.000697163 |
| ENSG00000100065.14_3 | CARD10   | protein_coding | -0.68356451 | 0.000668074 |
| ENSG00000140350.15_2 | ANP32A   | protein_coding | -0.68346431 | 0.028290011 |
| ENSG00000196139.13_3 | AKR1C3   | protein_coding | -0.68255167 | 0.001148455 |
| ENSG00000120937.8_2  | NPPB     | protein_coding | -0.68236635 | 0.002789716 |
| ENSG00000188042.7_3  | ARL4C    | protein_coding | -0.68227833 | 0.000158853 |
| ENSG00000159399.9_3  | HK2      | protein_coding | -0.68079541 | 3.57787E-05 |
| ENSG00000119139.17_3 | TJP2     | protein_coding | -0.68077832 | 0.000742271 |
| ENSG00000130751.9_2  | NPAS1    | protein_coding | -0.68063382 | 0.002076337 |
| ENSG00000169299.13_2 | PGM2     | protein_coding | -0.68041175 | 0.000309438 |
| ENSG00000177076.5_2  | ACER2    | protein_coding | -0.68036767 | 0.003488736 |
| ENSG00000180638.17_3 | SLC47A2  | protein_coding | -0.67910251 | 0.000798053 |
| ENSG00000143702.15_3 | CEP170   | protein_coding | -0.67899336 | 0.017654981 |
| ENSG00000170439.6_2  | METTL7B  | protein_coding | -0.67801323 | 0.006744052 |
| ENSG00000184640.17_3 | SEPT9    | protein_coding | -0.67573255 | 0.033284504 |
| ENSG00000131019.10_2 | ULBP3    | protein_coding | -0.6748186  | 0.000146594 |
| ENSG00000174640.12_2 | SLCO2A1  | protein_coding | -0.67372367 | 0.002359342 |
| ENSG00000108064.10_3 | TFAM     | protein_coding | -0.67319252 | 7.73775E-06 |
| ENSG00000139496.15_3 | NUP58    | protein_coding | -0.67226096 | 0.000295263 |
| ENSG00000255302.4_3  | EID1     | protein_coding | -0.6709954  | 0.000194532 |
| ENSG0000023902.13_2  | PLEKHO1  | protein_coding | -0.66832496 | 0.001341265 |
| ENSG00000073849.14_3 | ST6GAL1  | protein_coding | -0.66703575 | 0.000496402 |
| ENSG00000067057.16_3 | PFKP     | protein_coding | -0.66671806 | 2.13956E-05 |
| ENSG00000105976.14_3 | MET      | protein_coding | -0.66647075 | 0.000222248 |
| ENSG00000117500.12_2 | TMED5    | protein_coding | -0.66548945 | 4.77358E-06 |
| ENSG00000139318.7_2  | DUSP6    | protein_coding | -0.66490725 | 0.015670594 |
| ENSG00000197061.4_2  | HIST1H4C | protein_coding | -0.66395173 | 0.047813563 |
| ENSG00000188549.12_3 | C15orf52 | protein_coding | -0.66324999 | 0.004491623 |
| ENSG00000188229.5_2  | TUBB4B   | protein_coding | -0.66262542 | 0.000900633 |
| ENSG00000069869.15_2 | NEDD4    | protein_coding | -0.66244925 | 0.043514156 |
| ENSG00000145555.14_4 | MYO10    | protein_coding | -0.66241249 | 0.000437255 |
| ENSG00000156273.15_4 | BACH1    | protein_coding | -0.66232645 | 0.000689443 |
| ENSG00000172137.18_3 | CALB2    | protein_coding | -0.6623257  | 0.012122842 |
| ENSG00000107562.16_2 | CXCL12   | protein_coding | -0.6618842  | 0.003038715 |
| ENSG00000148773.13_3 | MKI67    | protein_coding | -0.66172611 | 0.008721119 |
| ENSG00000165895.17_2 | ARHGAP42 | protein_coding | -0.66143486 | 0.001976986 |
| ENSG00000185885.15_3 | IFITM1   | protein_coding | -0.65978466 | 7.94399E-06 |
| ENSG00000116954.7_2  | RRAGC    | protein_coding | -0.65881747 | 0.000757423 |
| ENSG00000221852.4_2  | KRTAP1-5 | protein_coding | -0.65851919 | 0.034781726 |
| ENSG00000118137.9_2  | APOA1    | protein_coding | -0.65719238 | 0.003030871 |
| ENSG00000151233.10_2 | GXYLT1   | protein_coding | -0.65675519 | 3.68059E-06 |
| ENSG00000163661.3_2  | PTX3     | protein_coding | -0.65515227 | 0.000409264 |

|                      |          |                |             |             |
|----------------------|----------|----------------|-------------|-------------|
| ENSG00000091972.18_3 | CD200    | protein_coding | -0.65409659 | 0.001780718 |
| ENSG00000106483.11_2 | SFRP4    | protein_coding | -0.65377113 | 0.000238737 |
| ENSG00000147872.9_3  | PLIN2    | protein_coding | -0.65367998 | 8.37017E-05 |
| ENSG00000100554.11_3 | ATP6V1D  | protein_coding | -0.65006131 | 0.012950108 |
| ENSG00000174010.9_2  | KLHL15   | protein_coding | -0.64948308 | 0.001242884 |
| ENSG00000152749.7_2  | GPR180   | protein_coding | -0.64810094 | 2.25691E-05 |
| ENSG00000134294.13_2 | SLC38A2  | protein_coding | -0.6479885  | 0.000254556 |
| ENSG00000077092.18_3 | RARB     | protein_coding | -0.64796566 | 0.038040997 |
| ENSG00000150630.3_2  | VEGFC    | protein_coding | -0.64757821 | 0.001149969 |
| ENSG00000163605.14_3 | PPP4R2   | protein_coding | -0.64697535 | 0.000306414 |
| ENSG00000130489.14_3 | SCO2     | protein_coding | -0.64650145 | 0.012052072 |
| ENSG00000152518.7_3  | ZFP36L2  | protein_coding | -0.64646197 | 0.000199137 |
| ENSG00000112715.21_4 | VEGFA    | protein_coding | -0.64606297 | 0.000172157 |
| ENSG00000109805.9_2  | NCAPG    | protein_coding | -0.64606076 | 0.000201913 |
| ENSG00000139644.12_4 | TMBIM6   | protein_coding | -0.64548686 | 9.20825E-07 |
| ENSG00000134352.19_2 | IL6ST    | protein_coding | -0.6438081  | 0.000270351 |
| ENSG00000188559.13_2 | RALGAPA2 | protein_coding | -0.64134504 | 0.00191695  |
| ENSG00000102554.13_2 | KLF5     | protein_coding | -0.63924855 | 0.002510247 |
| ENSG00000009413.15_3 | REV3L    | protein_coding | -0.63755059 | 0.000271159 |
| ENSG00000144909.7_2  | OSBPL11  | protein_coding | -0.63744242 | 0.000889053 |
| ENSG00000074800.13_3 | ENO1     | protein_coding | -0.63528882 | 0.000134156 |
| ENSG00000090339.8_2  | ICAM1    | protein_coding | -0.63446001 | 0.004892571 |
| ENSG00000108424.9_3  | KPNB1    | protein_coding | -0.63435213 | 6.62575E-05 |
| ENSG00000113161.15_3 | HMGCR    | protein_coding | -0.63427672 | 0.001222073 |
| ENSG00000189057.10_3 | FAM111B  | protein_coding | -0.6334361  | 8.86798E-05 |
| ENSG00000197646.7_2  | PDCD1LG2 | protein_coding | -0.63283454 | 0.002137159 |
| ENSG00000106546.12_2 | AHR      | protein_coding | -0.63223831 | 4.02194E-05 |
| ENSG00000114796.15_2 | KLHL24   | protein_coding | -0.62973863 | 9.71784E-05 |
| ENSG00000164924.17_4 | YWHAZ    | protein_coding | -0.62949857 | 9.09405E-05 |
| ENSG00000164609.9_2  | SLU7     | protein_coding | -0.62895453 | 0.000496281 |
| ENSG00000103642.11_3 | LACTB    | protein_coding | -0.62872508 | 0.000394775 |
| ENSG00000160326.13_3 | SLC2A6   | protein_coding | -0.62813783 | 5.8136E-05  |
| ENSG00000104147.8_2  | OIP5     | protein_coding | -0.62778007 | 0.000976489 |
| ENSG00000135766.8_2  | EGLN1    | protein_coding | -0.62467613 | 0.000167034 |
| ENSG00000168389.17_3 | MFSD2A   | protein_coding | -0.6234685  | 4.29315E-06 |
| ENSG00000148803.11_3 | FUOM     | protein_coding | -0.62302598 | 0.001001995 |
| ENSG00000145623.12_3 | OSMR     | protein_coding | -0.62255208 | 0.000430685 |
| ENSG00000120694.19_2 | HSPH1    | protein_coding | -0.62146484 | 7.28546E-05 |
| ENSG00000080819.6_3  | CPOX     | protein_coding | -0.62126421 | 0.00197867  |
| ENSG00000070495.14_2 | JMJD6    | protein_coding | -0.61959399 | 0.000453306 |
| ENSG00000144746.6_2  | ARL6IP5  | protein_coding | -0.61901446 | 0.000162036 |
| ENSG00000182481.8_3  | KPNA2    | protein_coding | -0.61693694 | 0.000468808 |
| ENSG00000240891.7_3  | PLCXD2   | protein_coding | -0.61611034 | 0.001696416 |
| ENSG00000125885.13_4 | MCM8     | protein_coding | -0.61604223 | 0.003488088 |



|                      |            |                |             |             |
|----------------------|------------|----------------|-------------|-------------|
| ENSG00000118600.11_2 | TMEM5      | protein_coding | -0.61409839 | 0.002575871 |
| ENSG00000115486.11_2 | GGCX       | protein_coding | -0.61404979 | 0.000164568 |
| ENSG00000179456.10_2 | ZBTB18     | protein_coding | -0.613284   | 0.000207022 |
| ENSG00000169826.7_2  | CSGALNACT2 | protein_coding | -0.61231645 | 1.52789E-05 |
| ENSG00000107968.9_2  | MAP3K8     | protein_coding | -0.61163969 | 0.001095513 |
| ENSG00000157111.12_2 | TMEM171    | protein_coding | -0.61040346 | 0.000363584 |
| ENSG00000137936.16_3 | BCAR3      | protein_coding | -0.61026754 | 0.000649537 |
| ENSG00000137193.13_2 | PIM1       | protein_coding | -0.60962343 | 0.000388104 |
| ENSG00000111897.6_2  | SERINC1    | protein_coding | -0.60954885 | 5.49246E-05 |
| ENSG00000124479.8_2  | NDP        | protein_coding | -0.60947152 | 0.016149252 |
| ENSG00000058668.14_3 | ATP2B4     | protein_coding | -0.60920315 | 0.02353024  |
| ENSG00000140332.15_2 | TLE3       | protein_coding | -0.60862942 | 0.000771361 |
| ENSG00000161921.14_3 | CXCL16     | protein_coding | -0.607294   | 0.001786573 |
| ENSG00000168496.3_3  | FEN1       | protein_coding | -0.60633502 | 0.005225342 |
| ENSG00000151632.17_3 | AKR1C2     | protein_coding | -0.60626478 | 0.000361955 |
| ENSG00000142945.12_2 | KIF2C      | protein_coding | -0.60497043 | 0.000686877 |
| ENSG00000153250.19_3 | RBMS1      | protein_coding | -0.60434432 | 5.44218E-05 |
| ENSG00000134202.10_2 | GSTM3      | protein_coding | -0.60311011 | 3.86054E-05 |
| ENSG00000166979.12_3 | EVA1C      | protein_coding | -0.60240349 | 0.017915834 |
| ENSG00000148700.14_3 | ADD3       | protein_coding | -0.60217869 | 0.010738301 |
| ENSG00000158290.16_2 | CUL4B      | protein_coding | -0.6017598  | 0.000118242 |
| ENSG00000166592.11_3 | RRAD       | protein_coding | -0.60147935 | 0.034666673 |
| ENSG00000159348.12_2 | CYB5R1     | protein_coding | -0.60037553 | 0.001943598 |
| ENSG00000145014.17_4 | TMEM44     | protein_coding | -0.60037122 | 0.012360587 |
| ENSG00000177425.10_4 | PAWR       | protein_coding | -0.60024749 | 7.86115E-05 |
| ENSG00000184661.13_2 | CDCA2      | protein_coding | -0.59973979 | 0.000742041 |
| ENSG00000198719.8_2  | DLL1       | protein_coding | -0.59952853 | 5.28258E-05 |
| ENSG00000137331.11_2 | IER3       | protein_coding | -0.59926345 | 0.003991273 |
| ENSG00000092470.11_2 | WDR76      | protein_coding | -0.59825412 | 0.014247997 |
| ENSG00000155903.11_3 | RASA2      | protein_coding | -0.59823692 | 0.000198322 |
| ENSG00000120833.13_4 | SOCS2      | protein_coding | -0.59780239 | 0.001672879 |
| ENSG00000167842.15_2 | MIS12      | protein_coding | -0.59687739 | 0.004017342 |
| ENSG00000186130.4_2  | ZBTB6      | protein_coding | -0.59619397 | 0.000858438 |
| ENSG00000175063.16_2 | UBE2C      | protein_coding | -0.59524207 | 0.000827583 |
| ENSG00000064419.13_2 | TNPO3      | protein_coding | -0.59473193 | 0.001062558 |
| ENSG00000113742.12_2 | CPEB4      | protein_coding | -0.59442705 | 0.00534436  |
| ENSG00000173926.5_2  | MARCH3     | protein_coding | -0.59431781 | 0.001756665 |
| ENSG00000095261.13_1 | PSMD5      | protein_coding | -0.59427561 | 0.000309973 |
| ENSG00000136044.11_2 | APPL2      | protein_coding | -0.59383759 | 0.011086665 |
| ENSG00000119138.4_2  | KLF9       | protein_coding | -0.59346563 | 0.000306331 |
| ENSG00000159167.11_2 | STC1       | protein_coding | -0.59230062 | 0.00140355  |
| ENSG00000087338.4_2  | GMCL1      | protein_coding | -0.59198734 | 0.001635249 |
| ENSG00000103888.16_2 | CEMIP      | protein_coding | -0.59174057 | 0.002648545 |
| ENSG00000092853.13_2 | CLSPN      | protein_coding | -0.59148292 | 0.011445273 |

|                      |       |                |             |             |
|----------------------|-------|----------------|-------------|-------------|
| ENSG00000113194.12_3 | FAF2  | protein_coding | -0.58686047 | 4.91191E-05 |
| ENSG00000153814.11_2 | JAZF1 | protein_coding | -0.58674905 | 0.000644524 |

**Table S2. Clinical characteristics of CAVD patients for the isolation of hVICs.**

| <b>Characteristics</b>    | <b>CAVD (n=38)</b> |
|---------------------------|--------------------|
| Age, years                | 55.03±11.6         |
| Male, %                   | 97                 |
| Smoking, %                | 18                 |
| Hypertension, %           | 32                 |
| Diabetes mellitus, %      | 13                 |
| Bicuspid aortic valves, % | 18                 |
| BMI, kg/m <sup>2</sup>    | 24.94±3.6          |
| triglycerides, mmol/L     | 1.65±1.36          |
| LDL, mmol/L               | 3.12±0.84          |
| HDL, mmol/L               | 1.13±0.41          |
| Cholesterol, μmol/L       | 4.82±1.09          |
| Statins, %                | 43                 |
| Beta-blocker, %           | 62                 |
| ACEI/ARB, %               | 46                 |

CAVD indicates calcific aortic valve disease; BMI, body mass index; LDL, low-density lipoprotein cholesterol; HDL, high-density lipoprotein cholesterol; ACEI/ARB, Angiotensin Converting Enzyme Inhibitors/Angiotensin Receptor Blockers. Values are presented as mean±SD when appropriate.

**Table S3. Primer sequences for RT-qPCR.**

| <b>Gene of interest</b> | <b>Primer sequences used for RT-qPCR (5'-3')</b> |
|-------------------------|--------------------------------------------------|
| human- $\beta$ -actin-F | CATGTACGTTGCTATCCAGGC                            |
| human- $\beta$ -actin-R | CTCCTTAATGTCACGCACGAT                            |
| human-GAPDH-F           | GAGTCAACGGATTTGGTCGT                             |
| human-GAPDH-R           | GACAAGCTTCCCGTTCTCAG                             |
| human-BMP2-F            | TTCGGCCTGAAACAGAGACC                             |
| human-BMP2-R            | CCTGAGTGCCTGCGATACAG                             |
| human-PALMD-F           | ACAGAAGCGTCTGAAAATAGAGG                          |
| human-PALMD-R           | TCCTTCGTTGAGATTTGCAGTTC                          |
| human-MSX2-F            | TGGATGCAGGAACCCGG                                |
| human-MSX2-R            | AGGGCTCATATGTCTTGGCG                             |
| human-ALPL-F            | ACTGGTACTCAGACAACGAGAT                           |
| human-ALPL-R            | ACGTCAATGTCCCTGATGTTATG                          |
| human-RUNX-F            | GCCTTCCACTCTCAGTAAGAAGA                          |
| human-RUNX-R            | GCCTGGGGTCTGAAAAAGGG                             |
| human-HIF1A-F           | GAACGTCGAAAAGAAAAGTCTCG                          |
| human-HIF1A-R           | CCTTATCAAGATGCGAACTCACA                          |
| human-SLC2A1-F          | GGCCAAGAGTGTGCTAAAGAA                            |
| human-SLC2A1-R          | ACAGCGTTGATGCCAGACAG                             |
| human-PFKFB3-F          | AGCCCGGATTACAAAGACTGC                            |
| human-PFKFB3-R          | GGTAGCTGGCTTCATAGCAAC                            |
| human-HK1-F             | CACATGGAGTCCGAGGTTTATG                           |
| human-HK1-R             | CGTGAATCCCACAGGTAAC TTC                          |
| human-PDK4-F            | GGAAGCATTGATCCTAACTGTGA                          |
| human-PDK4-R            | GGTGAGAAGGAACATACACGATG                          |
| human-PFKP-F            | GCATGGGTATCTACGTGGGG                             |
| human-PFKP-R            | CTCTGCGATGTTTGAGCCTC                             |
| human-PGK1-F            | GAACAAGGTTAAAGCCGAGCC                            |
| human-PGK1-R            | GTGGCAGATTGACTCCTACCA                            |
| human-ENO1-F            | GCCGTGAACGAGAAGTCCTG                             |
| human-ENO1-R            | ACGCCTGAAGAGACTCGGT                              |
| human-LDHA-F            | ATGGCAACTCTAAAGGATCAGC                           |
| human-LDHA-R            | CCAACCCCAACA ACTGTAATCT                          |
| human-PGM2-F            | GAGCTGCTATGGGACCTGGA                             |
| human-PGM2-R            | GCTCGGGCGTCAAACTGA                               |
| human-PKM-F             | AAGGGTGTGAACCTTCCTGG                             |
| human-PKM-R             | GCTCGACCCCAACTTCAGA                              |
| human-ALDOC-F           | GCCAAATTGGGGTGGAAAACA                            |
| human-ALDOC-R           | TTCACACGGTCATCAGCACTG                            |
| human-HK2-F             | GAGCCACCACTCACCCTACT                             |
| human-HK2-R             | CCAGGCATTCGGCAATGTG                              |
| human-TPI1-F            | ACTGCCTATATCGACTTCGCC                            |
| human-TPI1-R            | AAGCCCCATTAGTCACTTTGTAG                          |

|                 |                          |
|-----------------|--------------------------|
| human-TUBB2B-F  | GGCACGATGGATTCCGGTTAGG   |
| human-TUBB2B-R  | ACACGAAATTGTCTGGTCTGAAG  |
| human-CRABP2-F  | ATCGGAAAACCTTCGAGGAATTGC |
| human-CRABP2-R  | AGGCTCTTACAGGGCCTCC      |
| human-TRIB3-F   | AAGCGGTTGGAGTTGGATGAC    |
| human-TRIB3-R   | CACGATCTGGAGCAGTAGGTG    |
| human-RASSF8-F  | AGTTCAGAGGATTGTTTGTGGAG  |
| human-RASSF8-R  | CACATCACTAGCATACTGCCC    |
| human-ADM2-F    | CTGAGCCCCATCTGAAGCC      |
| human-ADM2-R    | CAGCACTGCGTGTAGACCAG     |
| human-SCG2-F    | ACCAGACCTCAGGTTGGAAAA    |
| human-SCG2-R    | AAGTGGCTTTCATCGCCATTT    |
| human-RABGEF1-F | ATGTGGATCAATCGGATCTCCT   |
| human-RABGEF1-R | GCTTTGTGGTACTCTTCCCTCC   |
| human-PSAT1-F   | TGCCGCACTCAGTGTTGTTAG    |
| human-PSAT1-R   | GCAATTCCCGCACAAGATTCT    |
| human-PCK2-F    | GGCTGAGAATACTGCCACACT    |
| human-PCK2-R    | ACCGTCTTGCTCTCTACTCGT    |
| human-GANAB-F   | TGGGGATTACCCTTGCTGTG     |
| human-GANAB-R   | CCGTATGCTTCTCTGTCGCT     |
| human-PLOD2-F   | CATGGACACAGGATAATGGCTG   |
| human-PLOD2-R   | AGGGGTTGGTTGCTCAATAAAAA  |
| human-MAGT1-F   | ATCGTTTGCGACGTTCCCTC     |
| human-MAGT1-R   | ACGGAGTAATTTCTCGGTGGG    |
| human-RGS4-F    | ACATCGGCTAGGTTTCCTGC     |
| human-RGS4-R    | GTTGTGGGAAGAATTGTGTTTAC  |
| human-TMX1-F    | TTGCGAAAGTAGATGTCACAGAG  |
| human-TMX1-R    | CTGATAGCGCCTAAATTCACCAT  |
| human-ARRDC3-F  | TGTATTCTAGTGGGGATACCGTC  |
| human-ARRDC3-R  | TCGCATGTCCTCTTGATGAA     |
| human-IL6-F     | ACTCACCTCTTCAGAACGAATTG  |
| human-IL6-R     | CCATCTTTGGAAGGTTTCAGGTTG |
| human-COLEC12-F | AATCCTTCGGTTACAAGCGGT    |
| human-COLEC12-R | ACTGTGATTGTTAGCAAGGCAC   |
| human-PDIA6-F   | GGACACTGCAAAAACCTAGAGC   |
| human-PDIA6-R   | CCAGAACCTGATTGACTGTAGCA  |
| human-RGS7BP-F  | CCTGGACGACTGCAAGATG      |
| human-RGS7BP-R  | ATGGCAGCCAATTTTTGGTGT    |
| human-IFNAR1-F  | ATTTACACCATTTTCGCAAAGCTC |
| human-IFNAR1-R  | TCCAAAGCCCACATAACACTATC  |
| human-IL1B-F    | AGCTACGAATCTCCGACCAC     |
| human-IL1B-R    | CGTTATCCCATGTGTGCAAGAA   |
| human-TNFAIP3-F | TCCTCAGGCTTTGTATTTGAGC   |
| human-TNFAIP3-R | TGTGTATCGGTGCATGGTTTTA   |

|                        |                         |
|------------------------|-------------------------|
| human-CASP3-F          | CATGGAAGCGAATCAATGGACT  |
| human-CASP3-R          | CTGTACCAGACCGAGATGTCA   |
| human-CXCL2-F          | AAGTGTGAAGGTGAAGTCCC    |
| human-CXCL2-R          | CCATTTTTTCAGCATCTTTTC   |
| human-CARD10-F         | CTGTGGGAGCGAATCGAGG     |
| human-CARD10-R         | CAGCGCAAGATGTCCATCA     |
| human-CXCL12-F         | ATTCTCAACACTCCAAACTGTGC |
| human-CXCL12-R         | ACTTTAGCTTCGGGTCAATGC   |
| human-CXCL8-F          | ACTGAGAGTGATTGAGAGTGGAC |
| human-CXCL8-R          | AACCCTCTGCACCCAGTTTTC   |
| human-PGK1-F           | GAACAAGGTTAAAGCCGAGCC   |
| human-PGK1-R           | GTGGCAGATTGACTCCTACCA   |
| human-TNF- $\alpha$ -F | GAGGCCAAGCCCTGGTATG     |
| human-TNF- $\alpha$ -R | CGGGCCGATTGATCTCAGC     |
| human-PFKFB3 -F        | CAACTCCCCAACCGTGATTGT   |
| human-PFKFB3 -R        | TGAGGTAGCGAGTCAGCTTCT   |
| human-ICAM-1 -F        | TTGGGCATAGAGACCCCGTT    |
| human-ICAM-1 -R        | GCACATTGCTCAGTTCATACACC |
| human-VCAM-1-F         | TTTGACAGGCTGGAGATAGACT  |
| human-VCAM-1-R         | TCAATGTGTAATTTAGCTCGGCA |
| human-E-selectin-F     | CAGCAAAGGTACACACACCTG   |
| human-E-selectin-R     | CAGACCCACACATTGTTGACTT  |

---

**Table S4. Source of primary and secondary antibodies used in the present study**

| Antibodies        | Source              | Catlogue no. | Dilution                           |     |
|-------------------|---------------------|--------------|------------------------------------|-----|
| Cleaved Caspase-3 | CST, Rabbit         | 9664s        | 1:2000 in 5%BSA                    |     |
| Caspase-3         | CST, Rabbit         | 9662s        | 1:2000 in 5%BSA                    |     |
| Vimentin          | Abcam, Mouse        | ab8978       | 1:500 in immunofluorescence        | for |
| SM22- $\alpha$    | Abcam, Rabbit       | ab209484     | 1:500 in immunofluorescence        | for |
| $\beta$ -actin    | SantaCruze, Mouse   | SC81178      | 1:2000 in 5%BSA                    |     |
| p65               | CST, Rabbit         | 8242s        | 1:2000 in 5%BSA                    |     |
| p-p65             | Abcam, Rabbit       | ab183559     | 1:2000 in 5%BSA                    |     |
| RUNX2             | Abcam, Rabbit       | ab23981      | 1:2000 in 5%BSA                    |     |
| PALMD             | Proteintech, Rabbit | 16531-1-AP   | 1:2000 in 5%BSA                    |     |
| Hexokinase 1      | Abcam, Rabbit       | ab150423     | 1:5000 in 5%BSA                    |     |
| PFKFB3            | Abcam, Rabbit       | ab181861     | 1:5000 in 5%BSA                    |     |
| BMP2              | Abcam, Rabbit       | ab214821     | 1:2000 in 5%BSA                    |     |
| MSX2              | Abcam, Rabbit       | ab223692     | 1:2000 in 5%BSA                    |     |
| BIP               | Proteintech, Rabbit | 11587-1-AP   | 1:2000 in 5%BSA                    |     |
| CD2AP             | Proteintech, Rabbit | 24122-1-AP   | 1:2000 in 5%BSA                    |     |
| MYH10             | Proteintech, Rabbit | 19673-1-AP   | 1:2000 in 5%BSA                    |     |
| MYH9              | Proteintech, Rabbit | 11128-1-AP   | 1:2000 in 5%BSA                    |     |
| FLAG              | Proteintech, Mouse  | 66008-3-Ig   | 4 $\mu$ g used immunoprecipitation | for |
| ICAM1             | CST, Rabbit         | 67836T       | 1:2000 in 5%BSA                    |     |
| GAPDH             | Proteintech, Rabbit | 10494-1-AP   | 1:2000 in 5%BSA                    |     |
| Ant-mouse HRP     | IgG CST             | 7076s        | 1:10000 in 5%BSA                   |     |
| Ant-rabbit HRP    | IgG CST             | 7074s        | 1:10000 in 5%BSA                   |     |

**Table S5. Sequences of PALMD and PFKFB3 siRNA**

| siRNA         | Sequence (5'-3')    |
|---------------|---------------------|
| PALMD siRNA 1 | GACUGAGGAUCCAUCUUA  |
| PALMD siRNA 2 | GAUCCAGGUUCUAGAACAA |
| PALMD siRNA 3 | GAUCCAAGAUCUUGAAAAA |
| PFKFB3 siRNA  | AGUUGUAGGAGCUGUACUG |

**Unedited gels**

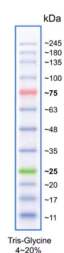

The protein ladder used in this study was obtained from Absin, Shanghai, China (abs923-500 $\mu$ l). The image on the left is provided by the supplier, and shows the SDS-PAGE band profile of the Spectra Multicolor Broad Range of this protein ladder. All the maker lanes around the bands of interest are labelled according to this protein ladder for the whole unedited gels.

**Figure 1 I**

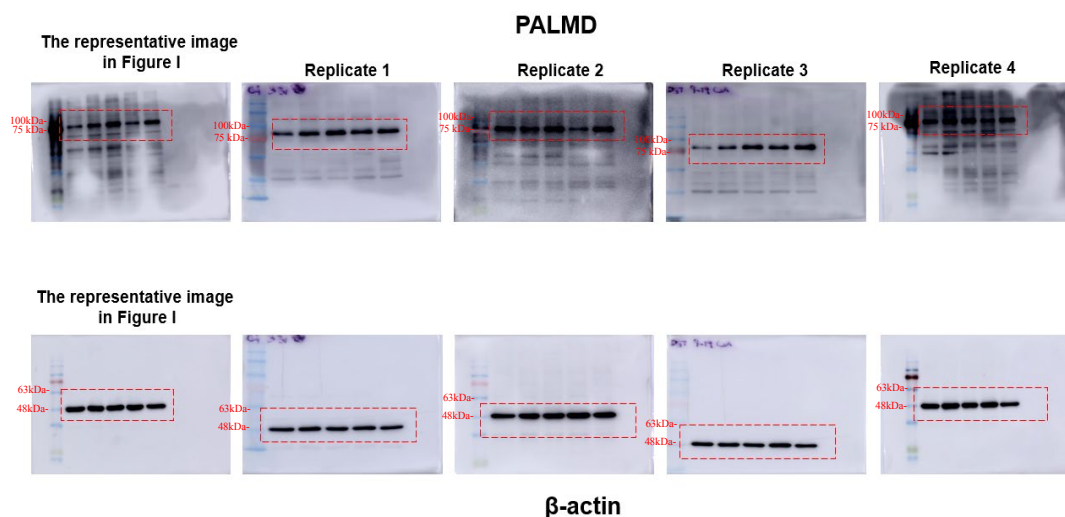

**Figure 2 G**

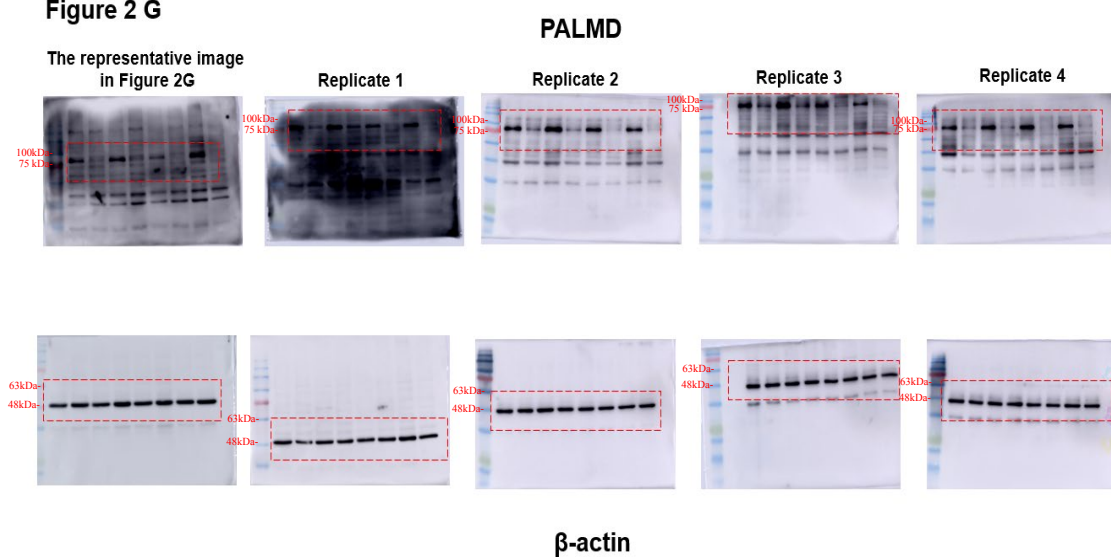

**Figure 2 G**

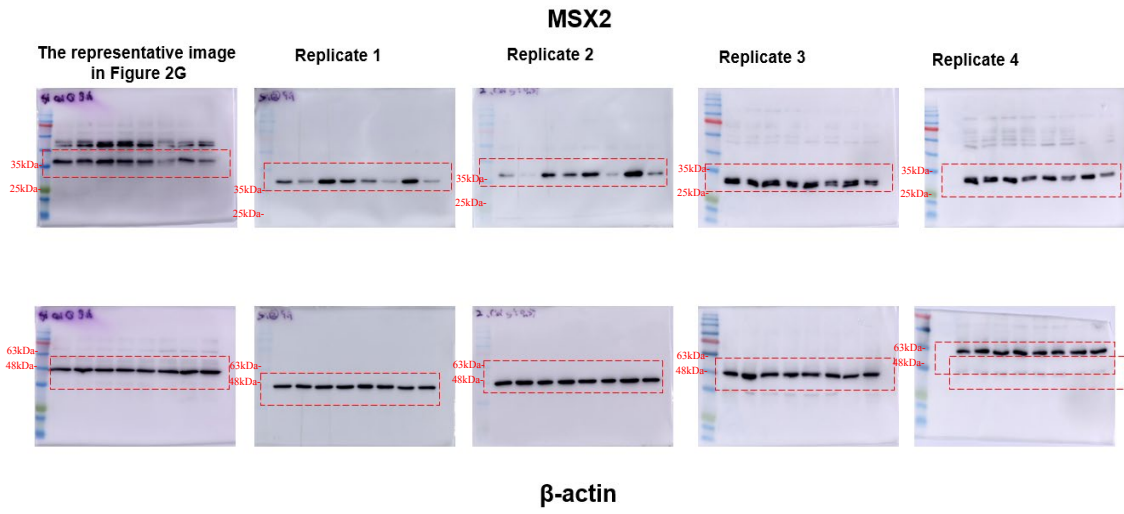

**Figure 2 G**

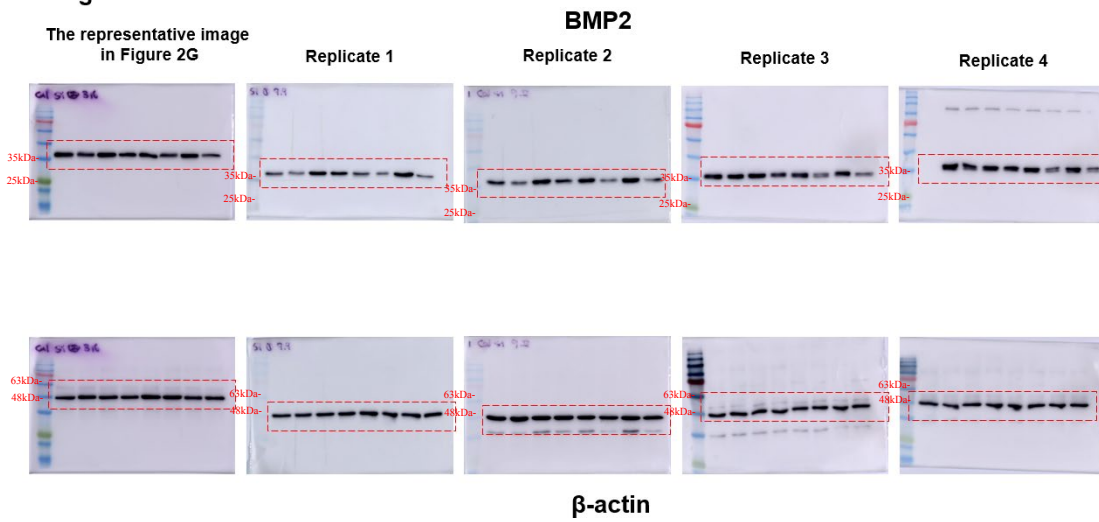

**Figure 2 G**

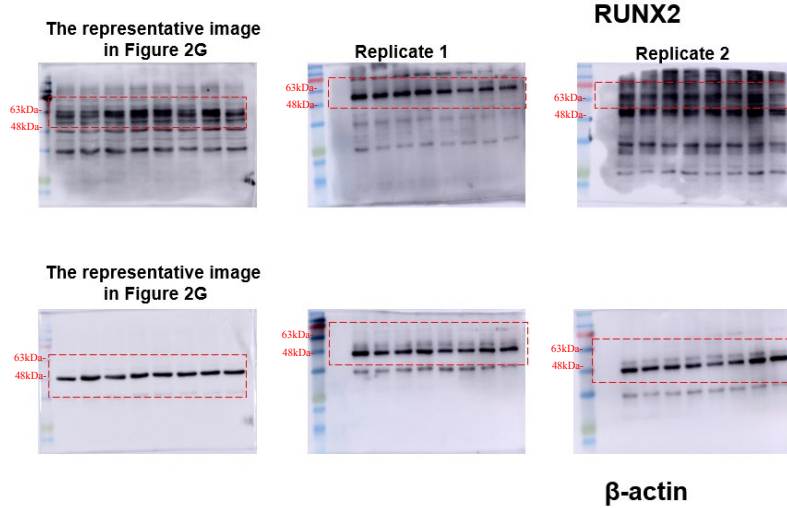



**Figure 2 G**

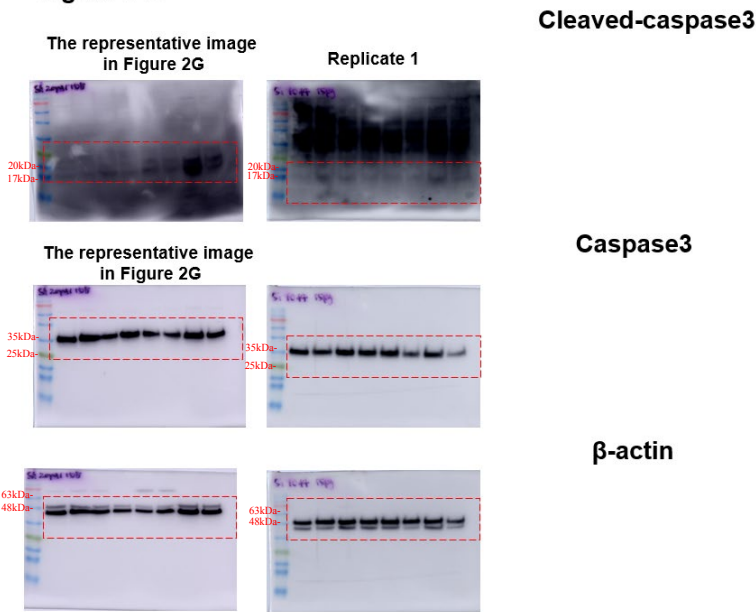

**Figure 2 L**

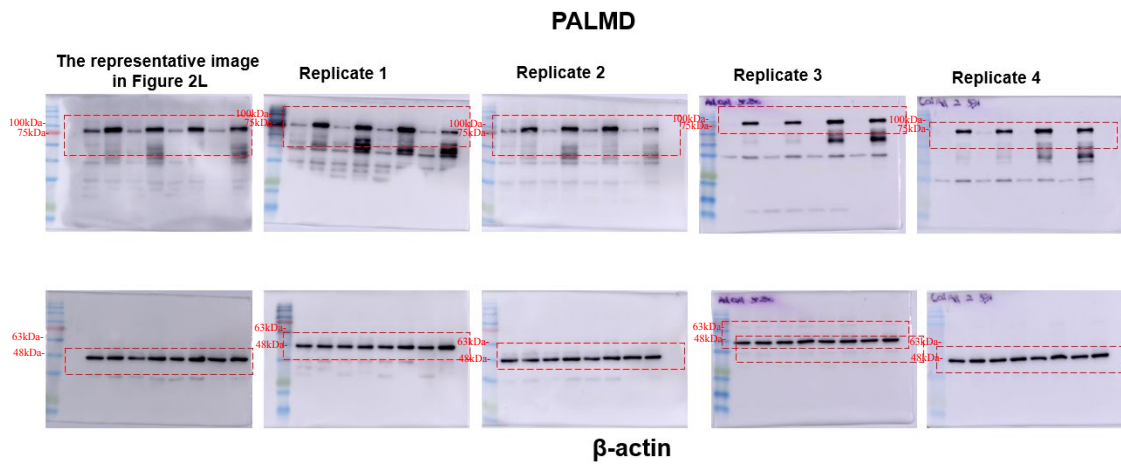

**Figure 2 L**

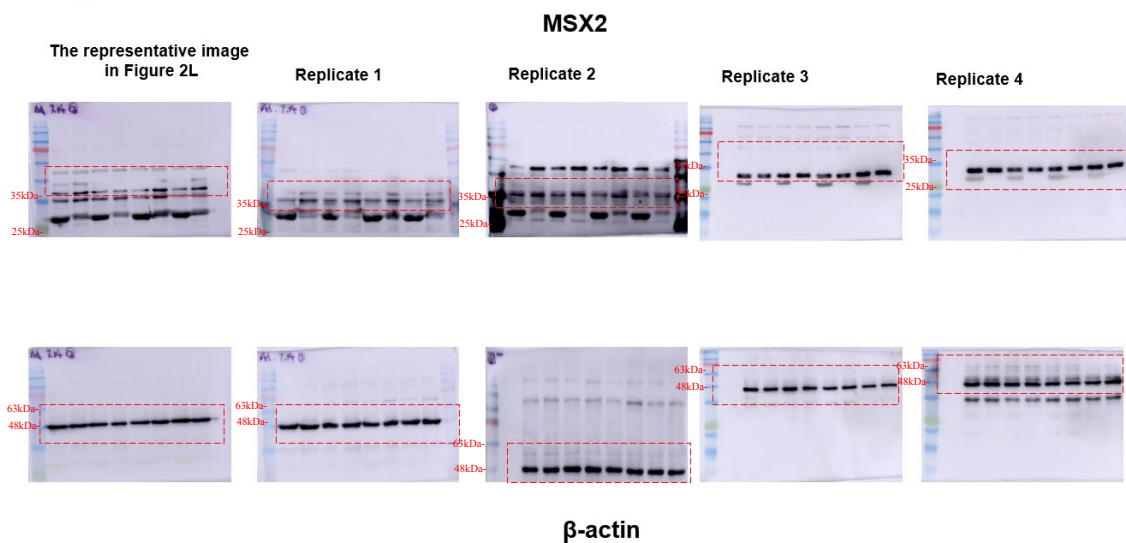

**Figure 2 L**

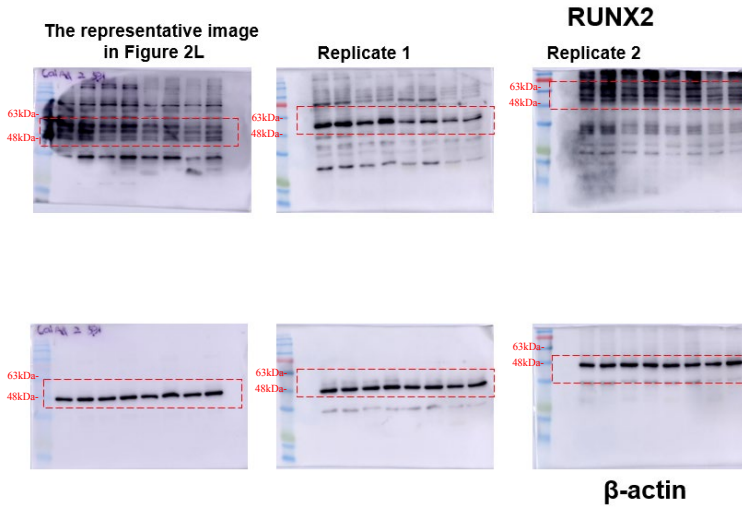

**Figure 2 L**

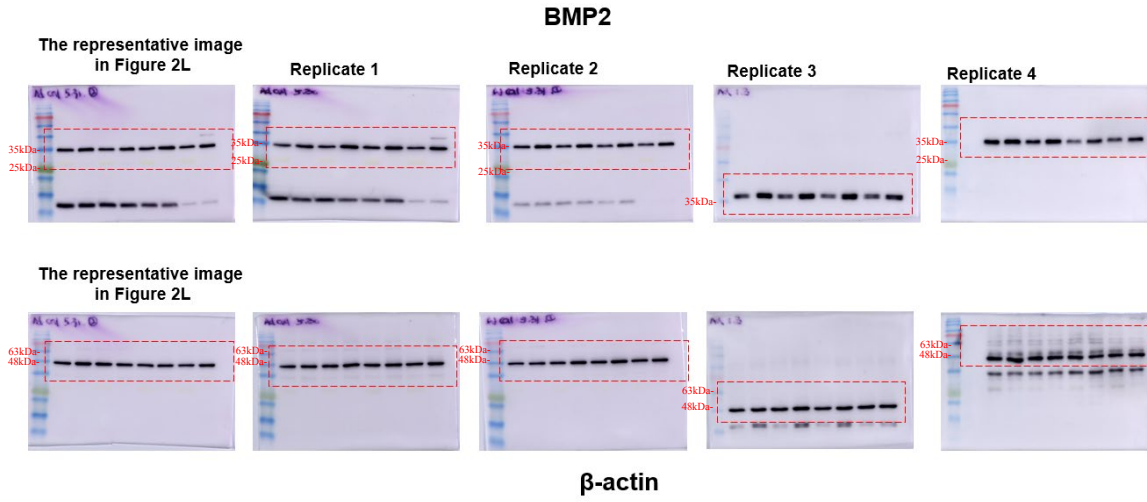

**Figure 2 L**

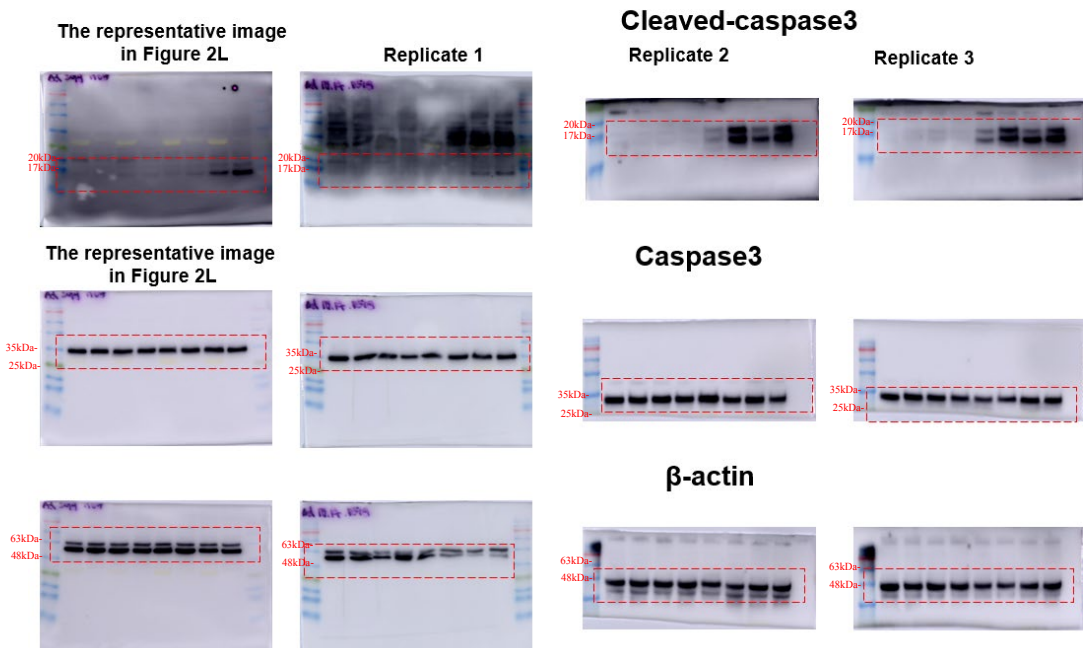

**Figure 4 B**

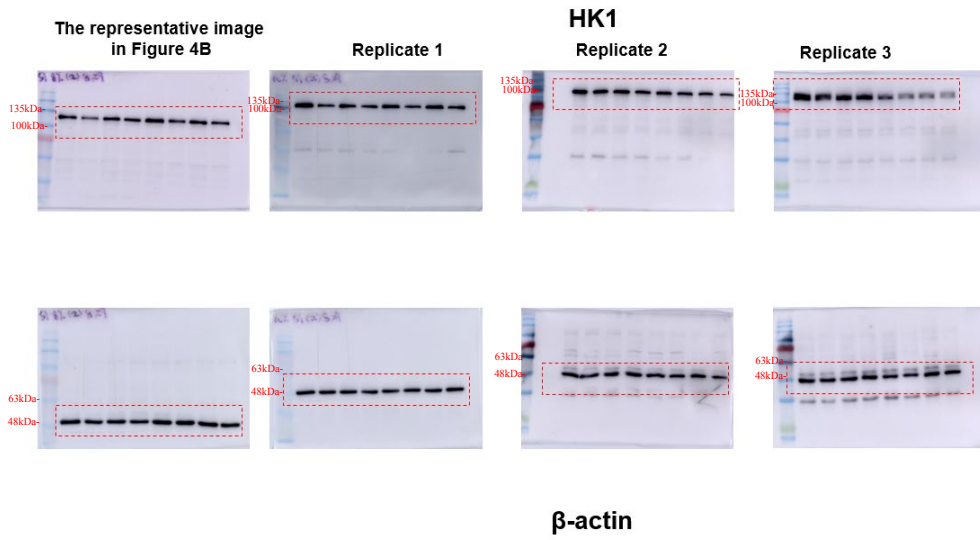

**Figure 4 B**

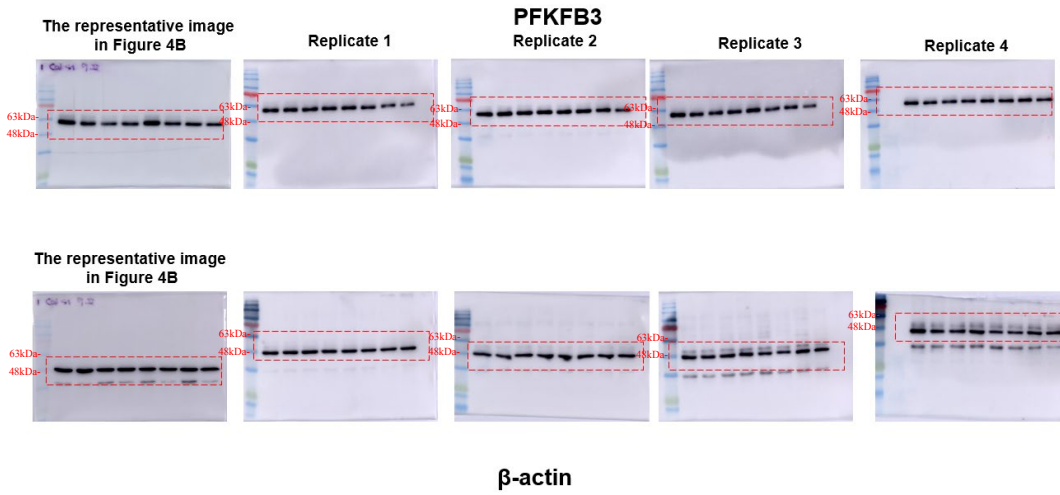

**Figure 4 D**

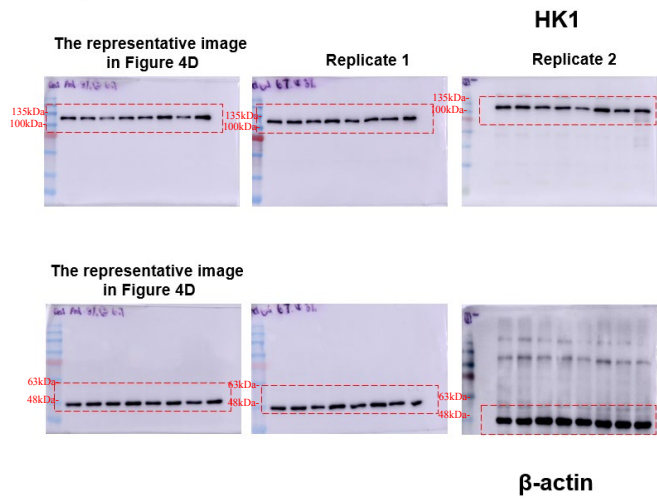

**Figure 4 D**

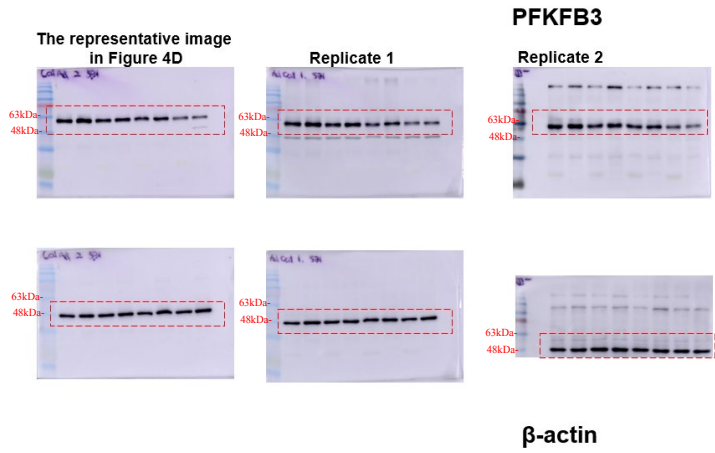

**Figure 5 D**

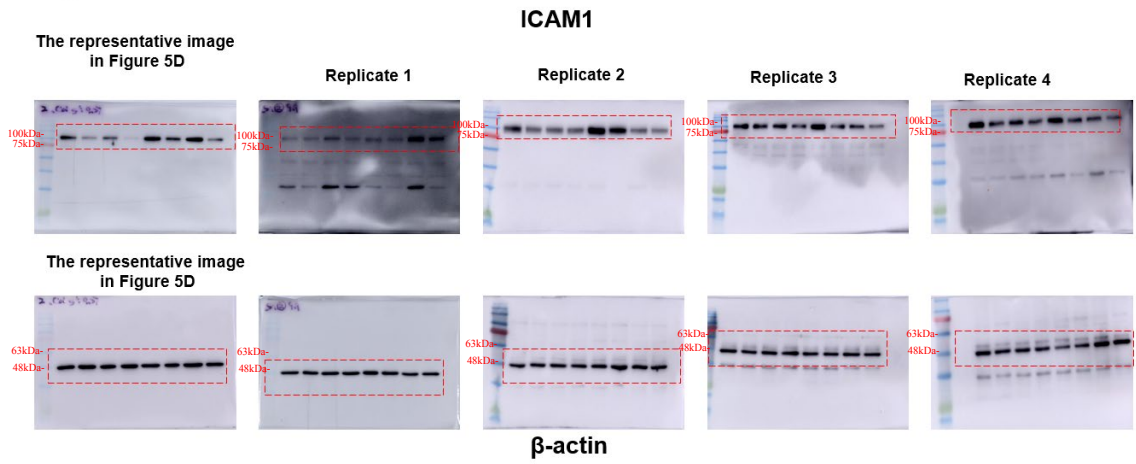

**Figure 5 G**

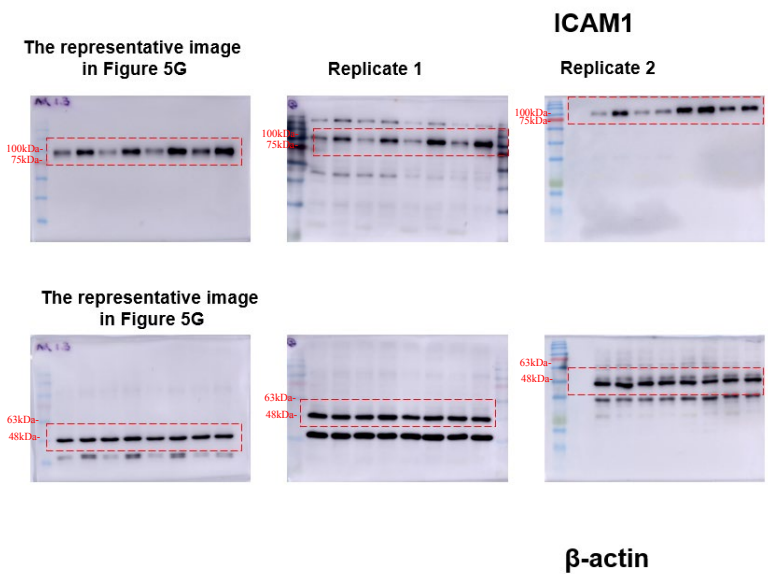



**Figure S4**

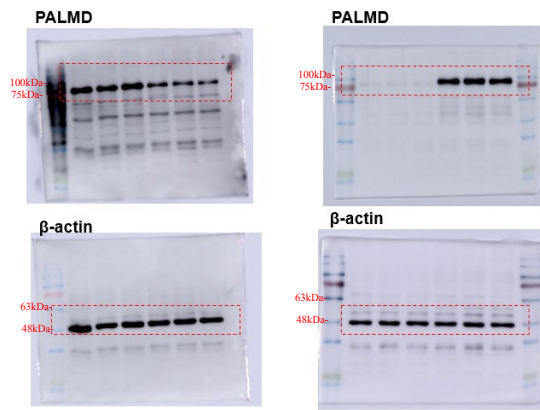

**Supplementary Figure S13**

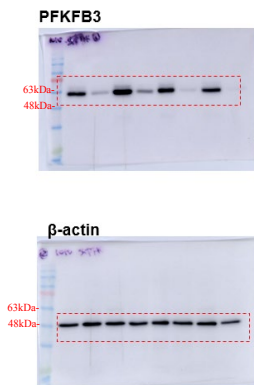

**Supplementary Figure S14G**

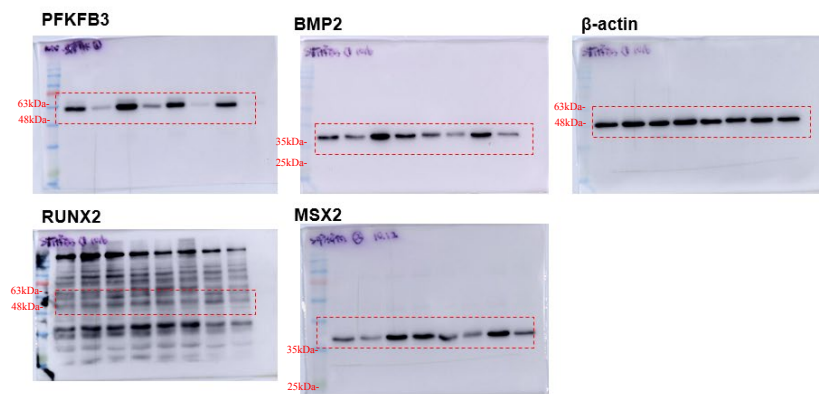

**Supplementary Figure S14J**

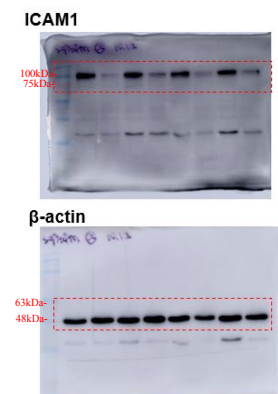

Supplement: mmc1.pdf [file mmc1.pdf]
